1 **Embryonic Protein NODAL Regulates the Breast Tumour Microenvironment by**  
2 **Reprogramming Cancer-Derived Secretomes**

3 Dylan Dieters-Castator<sup>1</sup>, Paola Marino Dantonio<sup>2</sup>, Matt Piaseczny<sup>1</sup>, Guihua Zhang<sup>3</sup>, Jiahui Liu<sup>3</sup>,  
4 Miljan Kuljanin<sup>4,5</sup>, Stephen Sherman<sup>4,6</sup>, Michael Jewer<sup>1,3</sup>, Katherine Quesnel<sup>6</sup>, Eun Young Kang<sup>7</sup>,  
5 Martin Köbel<sup>7</sup>, Gabrielle M. Siegers<sup>3</sup>, Andrew Leask<sup>6</sup>, David Hess<sup>4,6</sup>, Gilles Lajoie<sup>5</sup>, Lynne-Marie  
6 Postovit<sup>2,3\*</sup>

7

8 <sup>1</sup>Department of Anatomy and Cell Biology, University of Western Ontario, London ON, Canada;

9 <sup>2</sup>Department of Biomedical and Molecular Sciences, Queen's University, Kingston ON, Canada;

10 <sup>3</sup>Department of Oncology, University of Alberta, Edmonton AB, Canada; <sup>4</sup>Robarts Research

11 Institute, London ON, Canada; <sup>5</sup>Department of Biochemistry, University of Western Ontario,

12 London ON, Canada; <sup>6</sup>Department of Physiology and Pharmacology, University of Western

13 Ontario, London ON, Canada; and <sup>7</sup>Department of Pathology and Laboratory Medicine, University

14 of Calgary, Foothills Medical Centre, Calgary, AB, Canada;

15

16 \*To whom correspondence should be addressed: Lynne-Marie Postovit, 563 Botterell Hall,

17 Queen's University, Kingston ON, Canada, K7L 2V7; [l.postovit@queensu.ca](mailto:l.postovit@queensu.ca)

18

19

20

21

22

23 **Abstract**

24 The tumour microenvironment (TME) is an important mediator of breast cancer progression.  
25 Cancer-associated fibroblasts (CAFs) constitute a major component of the TME and may  
26 originate from tissue-associated fibroblasts or infiltrating mesenchymal stromal cells (MSCs). The  
27 mechanisms by which cancer cells activate fibroblasts and recruit MSCs to the TME are largely  
28 unknown, but likely include deposition of a pro-tumourigenic secretome. The secreted embryonic  
29 protein NODAL is clinically associated with breast cancer stage and promotes tumour growth,  
30 metastasis, and vascularization. Herein, we show that NODAL expression correlates with the  
31 presence of activated fibroblasts in human triple negative breast cancers and that it directly  
32 induces CAF phenotypes. We further show that NODAL reprograms cancer cell secretomes by  
33 simultaneously altering levels of chemokines (e.g. CXCL1), cytokines (e.g. IL-6) and growth  
34 factors (e.g. PDGFRA), leading to alterations in MSC chemotaxis. We therefore demonstrate a  
35 hitherto unappreciated mechanism underlying the dynamic regulation of the TME.

36

37

38

39

40

41

42

43

44

45

## 46 Introduction

47 Solid malignancies contain many non-transformed stromal cell types within the tumour  
48 microenvironment (TME). In breast cancer, a significant proportion of auxiliary cells, including  
49 cancer-associated fibroblasts (CAFs), pericytes, myoepithelial and endothelial cells, tumour-  
50 associated macrophages (TAMs) and other immune cell types, cooperate to promote pro-  
51 tumorigenic processes such as metastasis and drug resistance<sup>1-3</sup>. Dramatic gene expression  
52 changes in stromal cells are associated with the transformation of normal breast tissue to ductal  
53 carcinoma *in situ* (DCIS)<sup>4,5</sup>, and progression from DCIS to invasive ductal carcinoma (IDC) is  
54 marked by upregulated expression of extracellular matrix (ECM)-degrading proteases<sup>5</sup>, revealing  
55 an important role of TME components in breast cancer initiation and progression.

56 Among TME cell types, CAFs constitute the major stromal component of many breast cancers  
57 and have recently emerged as potential therapeutic targets<sup>6-8</sup>. Fibroblasts are the main producers  
58 of ECM and play fundamental roles in tissue repair, during which they acquire an activated  
59 myofibroblast phenotype characterized by  $\alpha$ -smooth muscle actin ( $\alpha$ -SMA) expression<sup>9,10</sup>.  
60 Fibroblasts are highly responsive to their microenvironment, interacting with and influencing a  
61 wide range of cells. For example, fibroblasts promote angiogenesis through the secretion of  
62 vascular endothelial growth factor A (VEGFA)<sup>11</sup>, coordinate immune response through cytokine  
63 and chemokine release<sup>12,13</sup>, and influence epithelial stem cells<sup>14,15</sup>. Ligands from the transforming  
64 growth factor beta (TGF- $\beta$ ) family are well-known fibroblast activators<sup>16,17</sup>, as are cytokines<sup>18</sup> and  
65 ECM remodelling<sup>19,20</sup>. Extracellular factors, such as cytokines and ECM proteins, mediate the pro-  
66 tumorigenic behaviours of CAFs. For instance, CAF-derived CXCL12/stromal derived factor  
67 (SDF-1) can mobilize endothelial progenitor cells (EPCs) to increase vascularization of MCF-7  
68 xenografts<sup>21</sup>. Moreover, subsets of CAFs can increase tumorigenesis and breast cancer stem cell  
69 (BCSC) enrichment by secreting interleukins (IL) IL-6, IL-8 and IL-1 $\beta$ <sup>6,7,22</sup>. Several recent studies  
70 have demonstrated that CAFs are heterogeneous and can be derived through activation of tissue-

71 associated fibroblasts<sup>23</sup>, as well as the recruitment of mesenchymal stromal cells (MSCs)<sup>24,25</sup>. In  
72 fact, up to 20% of CAFs were derived from MSCs in a CXCL6/CXCR6-dependent manner in a  
73 mouse model of gastric cancer<sup>26</sup>. An orthotopic breast cancer model revealed that MSCs can be  
74 recruited to primary tumour sites and that TGF- $\beta$ 1 is involved in this process<sup>27</sup>. MSCs also acquire  
75 CAF-like phenotypes when cultured in tumour conditioned media or mixed with cancer cells in  
76 mouse xenografts<sup>28-30</sup>. The mechanisms underlying MSC recruitment are not fully understood, but  
77 it is becoming increasingly clear that this population may contribute to the CAF compartment in  
78 the TME.

79 Limited genetic alterations have been described in breast cancer-associated stromal cells<sup>31-</sup>  
80 <sup>34</sup>, suggesting that changes in gene expression observed in these cells are mainly due to  
81 epigenetic reprogramming<sup>35,36</sup>. For instance, breast cancer cells induce fibroblasts to secrete the  
82 ECM protein degrader ADAMTS1 through epigenetic changes<sup>37</sup>, demonstrating that the  
83 epigenetic reprogramming in stromal cells can be induced by cancer cells. The cancer secretome  
84 plays a vital role in the pro-tumorigenic effects of the TME, recruiting stromal cells and  
85 reprogramming them to support tumour progression<sup>38-40</sup>.

86 Several studies have uncovered tumour promoting roles for the secreted TGF- $\beta$  superfamily  
87 member and embryonic morphogen NODAL<sup>41,42</sup>. NODAL expression, while primarily restricted to  
88 embryonic development and human embryonic stem cells (hESCs), has been observed in  
89 melanoma, glioblastoma, breast, pancreatic and hepatocellular cancers, amongst others<sup>42,43</sup>. In  
90 breast cancer, NODAL clinically correlates with stage and vascularization<sup>44,45</sup>. Moreover, NODAL  
91 expression emerges in breast cancers as they transition from DCIS into IDC<sup>46</sup>, wherein  
92 interactions between cancer and stromal cells are critical. NODAL inhibition reduces breast  
93 cancer-induced neovascularization and mitigates BCSC frequencies, tumour growth, and  
94 invasion<sup>47-49</sup>. NODAL may also play an essential role in remodeling the TME. For example,  
95 NODAL seems to induce a breast cancer secretome that promotes angiogenesis through

96 regulation of the angiogenic factors platelet-derived growth factor (PDGF) and vascular  
97 endothelial growth factor (VEGF)<sup>45</sup>. Furthermore, NODAL expression is inversely correlated with  
98 susceptibility to gamma delta ( $\gamma\delta$ ) T cell cytotoxicity, at least in part through decreased surface  
99 expression of the immune activating danger signal MHC class I polypeptide-related sequence A/B  
100 (MICA/B)<sup>50</sup>. CAFs from a gastric cancer mouse model have recently been shown to promote  
101 cancer cell proliferation and resistance to doxorubicin via NODAL secretion<sup>51</sup> and NODAL  
102 appears to induce CAF-like phenotypes in mouse and human fibroblast cell lines<sup>52</sup>. The extent to  
103 which NODAL may affect CAF phenotypes in the breast TME has not, however, been explored.

104 In this study, we investigated the impact of NODAL on CAFs and MSCs within the triple  
105 negative breast cancer (TNBC) TME. We demonstrate that NODAL strongly correlates with CAFs  
106 in breast cancer patients and that this morphogen can directly signal to fibroblasts (but not to  
107 MSCs) to induce a CAF-associated phenotype. In addition, mass spectrometry-based proteomics  
108 of conditioned media derived from triple negative MDA-MB-231 and triple negative inflammatory  
109 SUM149 breast cancer cells demonstrated that NODAL is a potent regulator of the breast cancer  
110 secretome. Our analyses revealed cancer cell-type-specific alterations in several novel NODAL-  
111 regulated factors, including CXCL1, CXCL8, IL-6 and colony-stimulating factor 1 (CSF1),  
112 suggesting that NODAL may impact the ability of breast cancer cells to recruit a variety of stromal  
113 cell types. Accordingly, we found that MSC chemotaxis towards breast cancer cells is affected by  
114 NODAL-regulated factors such as IL-6. Collectively, these data reveal a previously unknown role  
115 for NODAL in the regulation of breast cancer TME.

116

117

118

119

120 **Results**

121 **Cancer cells expressing NODAL associate with  $\alpha$ -SMA-positive stromal cells in triple**  
122 **negative breast tumors**

123 Because fibroblast activation (demarcated by  $\alpha$ -SMA expression) and NODAL expression occur  
124 early during breast cancer progression<sup>46</sup>, we investigated whether these events could be  
125 correlated. We evaluated the expression and localization of NODAL and  $\alpha$ -SMA in 41 primary  
126 tumour tissue samples from a cohort of 20 TNBC cases (**Table I**). Representative images are  
127 shown in **Fig. 1**. NODAL expression was observed in 92.7% of samples (38/41) (**Table I**), while  
128  $\alpha$ -SMA was detected in all slides. Stromal-associated  $\alpha$ -SMA (**Fig. 1b, d**) was observed in all 38  
129 NODAL-positive samples and the intensity of  $\alpha$ -SMA staining was found to be increased in 94.7%  
130 (36/38) of regions with NODAL-positive cells as compared to NODAL-negative regions (**Table I**).  
131 Notably,  $\alpha$ -SMA was also detected in areas that were negative for NODAL; however, in these  
132 instances,  $\alpha$ -SMA delineated myoepithelial cells (**Fig. 1e, f**). Overall, these results reveal a strong  
133 association between NODAL and  $\alpha$ -SMA expression in the stroma of TNBC patients, suggesting  
134 NODAL could have an impact on CAF phenotypes in breast cancer.

135

136

137

138

139

140

141

142

143

**Table I.** NODAL and  $\alpha$ -SMA evaluation by immunohistochemistry.

|                                                       | <i>n</i> (%) |
|-------------------------------------------------------|--------------|
| <b>NODAL score – Median (range)</b>                   | 2 (0-3)      |
| 0                                                     | 3 (7.3)      |
| 1                                                     | 10 (24.4)    |
| 2                                                     | 19 (46.3)    |
| 3                                                     | 9 (22.0)     |
| <b>NODAL percentage (%) – Median (range)</b>          | 50 (5-100)   |
| NA                                                    | 3 (7.3)      |
| 5-20                                                  | 12 (29.3)    |
| 30-40                                                 | 7 (17.1)     |
| 60-80                                                 | 14 (34.1)    |
| 90-100                                                | 5 (12.2)     |
| <b>NODAL distribution</b>                             |              |
| NA                                                    | 3 (7.3)      |
| Diffuse                                               | 17 (41.5)    |
| Scattered                                             | 20 (48.8)    |
| Focal                                                 | 1 (2.4)      |
| <b><math>\alpha</math>-SMA score – Median (range)</b> | 2 (1-3)      |
| 1                                                     | 3 (7.3)      |
| 2                                                     | 29 (70.7)    |
| 3                                                     | 9 (22.0)     |
| <b>Intensity Association</b>                          |              |
| NA                                                    | 3 (NA)       |
| Yes                                                   | 36 (94.7)    |
| No                                                    | 2 (5.3)      |

144

145

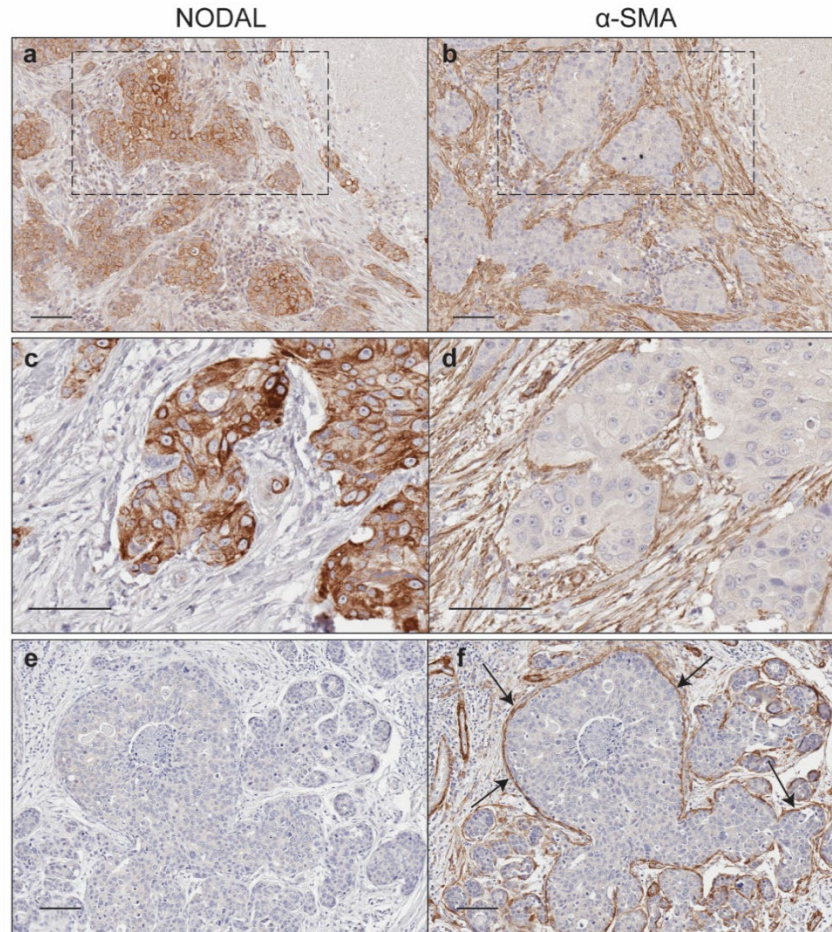

146

147 **Figure 1. Breast cancer cells expressing NODAL reside adjacent to  $\alpha$ -SMA-positive stromal cells.**

148 Representative images are shown wherein NODAL (a, c, e) and  $\alpha$ -SMA (b, d, f) are stained in serial  
149 sections of tissue from triple negative breast cancer patients. **(a-d)** NODAL-positive breast cancer cells  
150 are surrounded by diffuse  $\alpha$ -SMA+ stromal cells (for example in square). **(e, f)** In NODAL-negative  
151 sections,  $\alpha$ -SMA is localized only to basement membranes (arrows). Bar equals 100  $\mu$ m.

152

### 153 **NODAL induces fibroblast activation and chemotaxis**

154 Since we found a consistent spatial association between NODAL and stromal  $\alpha$ -SMA in human  
155 TNBC tissues, we decided to examine whether NODAL affects, directly or indirectly, breast  
156 cancer-induced fibroblast phenotypes (**Fig. 2**). MDA-MB-231 TNBC cells express high basal  
157 levels of NODAL, therefore we investigated if serum-free conditioned media (CM) of MDA-MB-  
158 231 cells stably expressing scrambled control (shControl) or NODAL knockdown (shNODAL)



159 shRNA (**Fig. 2a**) can differentially impact primary fibroblasts. We also explored the effects of  
160 recombinant human NODAL (rhNODAL) on these cells. We detected a small, but statistically  
161 insignificant reduction in primary human foreskin fibroblast (HFF) chemotaxis towards CM from  
162 shNODAL versus shControl MDA-MB-231 cells (**Fig. 2b**), while rhNODAL (10 and 100 ng/mL)  
163 increased HFF chemotaxis (**Fig. 2c**), proliferation (**Fig. 2d**) and invasion (**Fig. 2e**). Further  
164 addressing fibroblast activation by NODAL, real-time RT-PCR revealed that rhNODAL (10 and  
165 100ng/mL) induced expression of  $\alpha$ -SMA, desmin, and connective tissue growth factor (CTGF)  
166 (**Fig. 2f**), which are CAF markers. In addition, we performed gene expression profiling on human  
167 dermal fibroblasts (HDFs) treated with 10ng/mL rhNODAL for 6h. Transcripts upregulated by at  
168 least 1.7 fold were analyzed in DAVID; gene clusters associated with the GO terms “wound  
169 healing”, “cell motion”, “extracellular matrix” and “growth factor” were significantly enriched (**Fig.**  
170 **2g; Sup. Table 1**)<sup>53</sup>, suggesting that fibroblasts are indeed activated by NODAL.

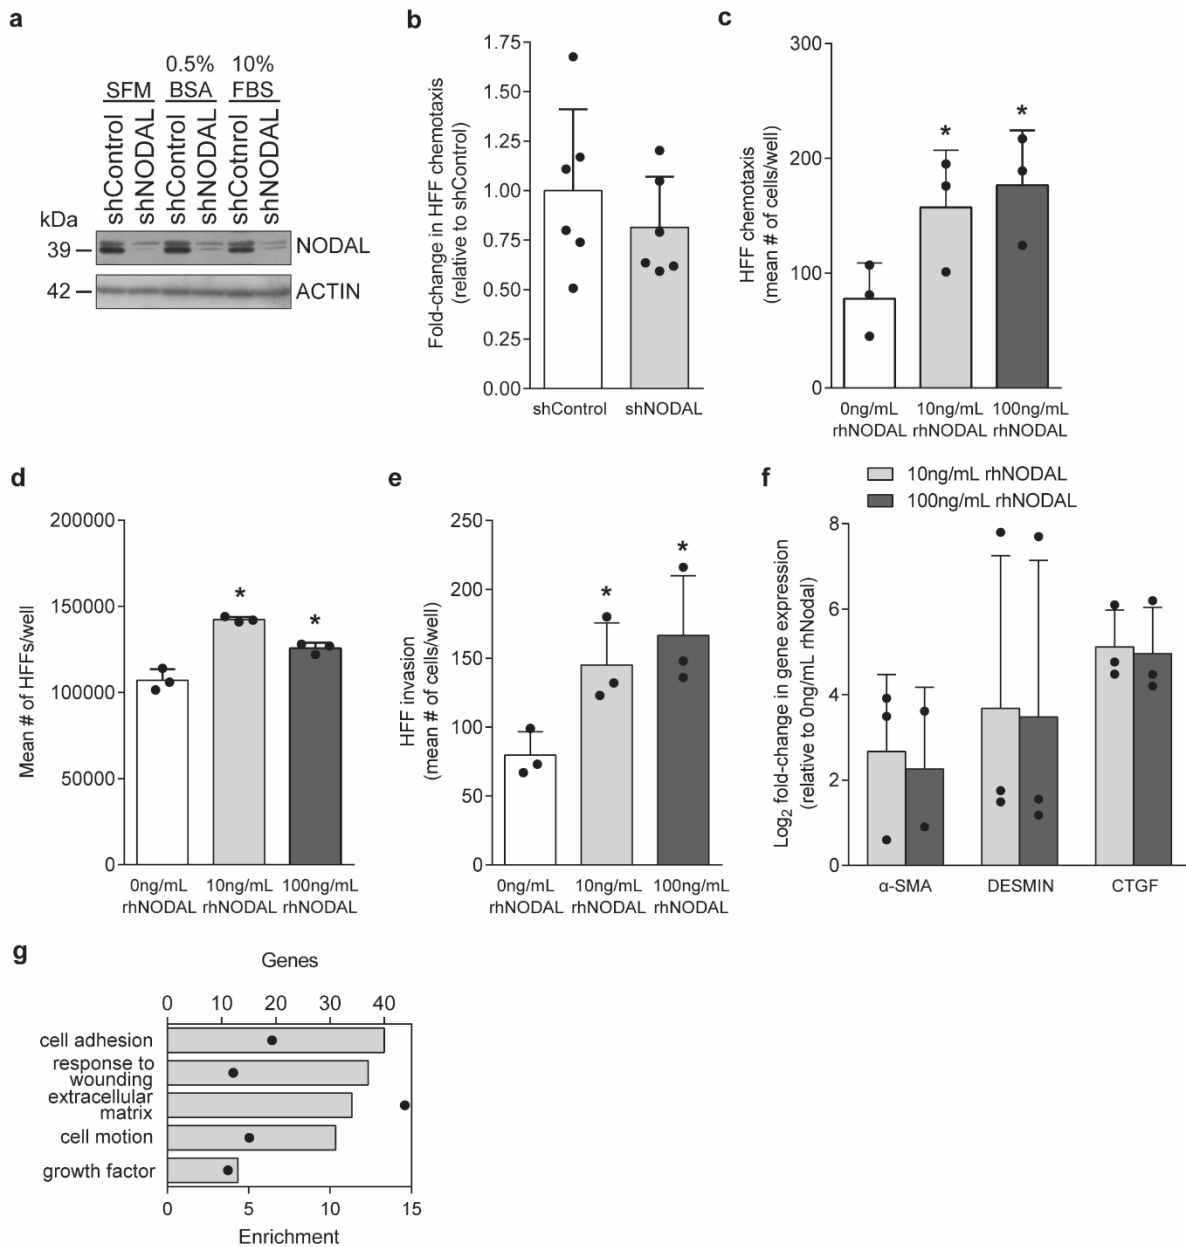

171

172 **Figure 2. NODAL directly promotes phenotypes associated with activated fibroblasts in HFFs. (a)**

173 NODAL expression in MDA-MB-231 cells stably expressing scrambled (shControl) or NODAL knockdown

174 (shNODAL) shRNA cultured in SFM, SFM+0.5%BSA (0.5%BSA), or complete media (10% FBS). (b) HFF

175 chemotaxis towards CM from MDA-MB-231 cells (n=6). (c-e) Exposure to rhNODAL (10 and 100ng/mL)

176 significantly increased HFF chemotaxis, proliferation, and invasion (n=3); Dunnett's multiple comparison

177 test, \*p<0.05. (f) HFFs upregulated transcripts ( $\alpha$ -SMA, DESMIN and CTGF) associated with activated

178 fibroblasts following treatment with rhNODAL (10 and 100ng/mL; n=3, n=2 for  $\alpha$ -SMA from 100ng/mL

179 treatment). (g) Total genes (bars) upregulated by NODAL (10ng/mL) more than 1.7-fold in human dermal

180 fibroblasts (HDFs) and their corresponding enrichment (black dots) following GO analysis in DAVID.

181 **The NODAL-regulated MDA-MB-231 secretome impacts MSC chemotaxis**

182 The fibroblast population in breast cancer is highly heterogeneous and likely derived from different  
183 cell types<sup>23,54</sup>. Given the involvement of MSCs in tumour growth and neovascularization, and their  
184 probable contribution to the CAF population, we examined how NODAL affects the capacity of  
185 breast cancer cells to promote chemotaxis by comparing the ability of CM from shControl and  
186 shNODAL knockdown MDA-MB-231 cells to influence MSC chemotaxis (**Fig. 3**). Several primary  
187 human bone marrow-derived (BM-)MSC lines were utilized herein, some of which have been  
188 previously shown to form tubes *in vitro* and stimulate islet regeneration and revascularization *in*  
189 *vivo*<sup>55,56</sup>. In three out of four MSC lines, chemotaxis was significantly decreased (~1.8 to 3.5-fold)  
190 towards shNODAL CM as compared to shControl CM. We did not observe appreciable  
191 differences in proliferation or viability of MSCs cultured in CM for 24h, suggesting that the effects  
192 observed were not due to alterations in cell numbers, but rather a result of altered chemotaxis  
193 (**Sup. Fig. 1a**).

194 The reduction in MSC chemotaxis observed when NODAL was knocked down could not be  
195 rescued by the addition of 100ng/mL of rhNODAL (**Fig. 3a, b, d**) suggesting that MSCs are unable  
196 to sense this morphogen, perhaps due to an absence of receptor components. Hence, we  
197 performed real-time RT-PCR and western blotting for NODAL, its receptor (ALK4) and co-receptor  
198 (CRIPTO) on MSC lines (**Fig. 4a, b**). MSCs expressed moderate levels of NODAL and high levels  
199 of ALK4 at the transcript and protein level (**Fig. 4a, b**). *CRIPTO* mRNA expression approached  
200 the reliable limit of detection by quantitative real-time PCR (35 cycles) (**Fig. 4a**). Hence, while  
201 MSCs appear to make NODAL and to express NODAL receptors, they may not express enough  
202 *CRIPTO* to sense NODAL. Stimulation with 10 and 100 ng/mL rhNODAL did not affect canonical  
203 or non-canonical signalling through SMAD2 or ERK1/2 phosphorylation, respectively (**Fig. 4c**). In  
204 contrast to MSCs, which appeared unresponsive to NODAL, we found that rhNODAL (10 and

205 100ng/mL) caused an increase in both SMAD2 and ERK1/2 activation in fibroblasts (**Fig. 4d**),  
206 suggesting NODAL can directly promote fibroblast activation.

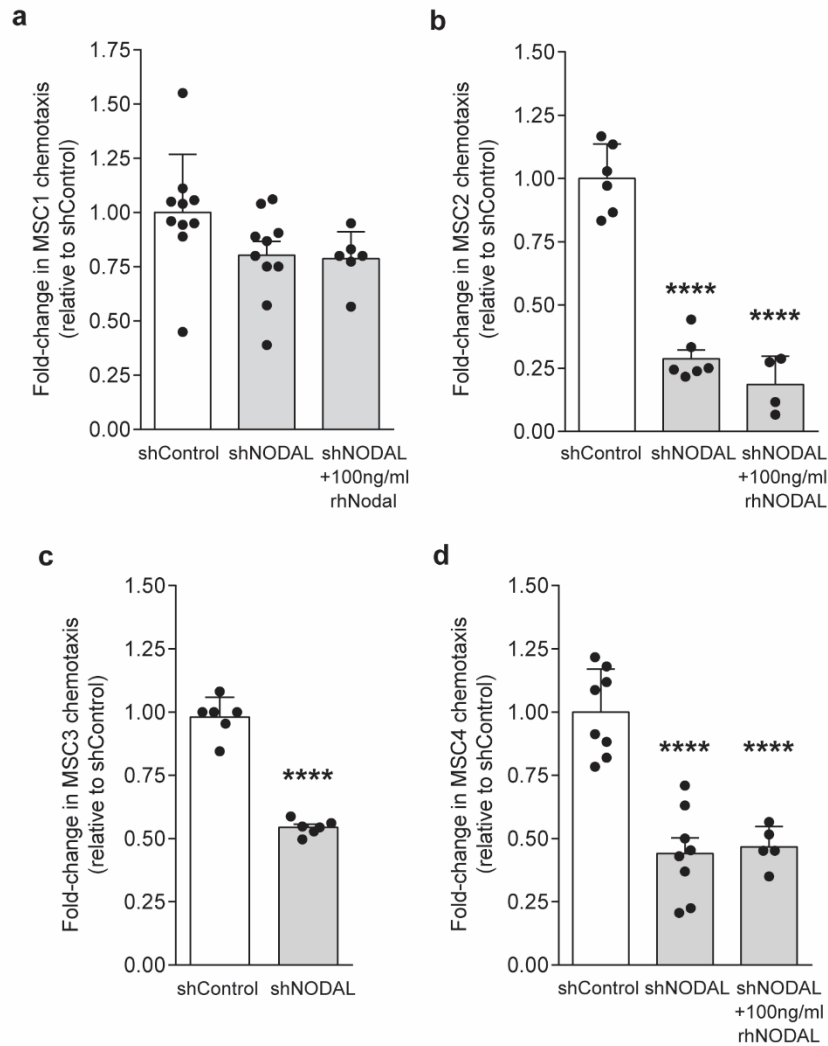

207

208 **Figure 3. Conditioned media from NODAL-knockdown MDA-MB231 breast cancer cells indirectly**  
209 **modulates MSC chemotaxis. (a-d)** Human bone-marrow derived MSC lines (MSC1-4) were plated onto  
210 fibronectin-coated transwells in the presence of CM (shControl or shNODAL +/-100ng/mL rhNODAL). MSC  
211 chemotaxis was significantly lower towards shNODAL CM compared to shControl CM after 24h and was  
212 not rescued by rhNODAL; \*\*\*\*p<0.0001, Dunnett's multiple comparison test.

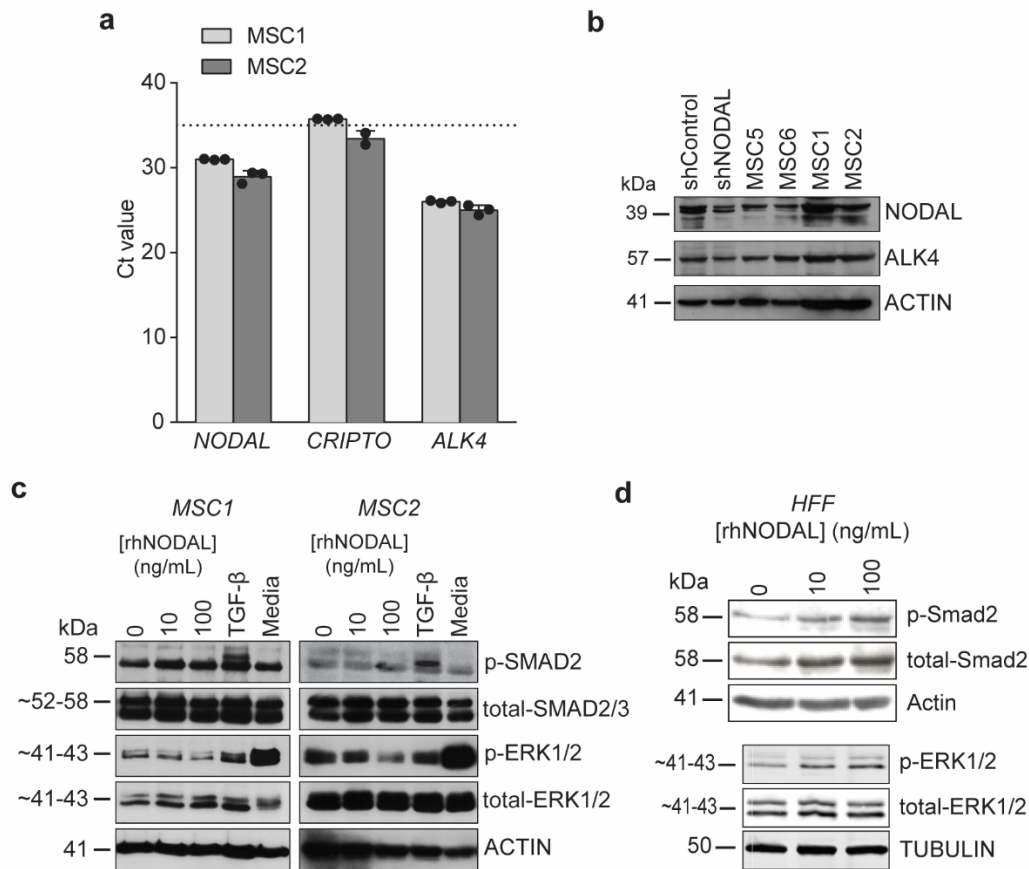

213

214 **Figure 4. NODAL signaling in MSCs.** (a) Real time PCR cycle threshold (Ct) values for *NODAL*, *ALK4*  
 215 and *CRIPTO* in MSCs. Data are presented as mean Ct values  $\pm$  SD from three biological replicates except  
 216 for *CRIPTO* (n=2 for MSC2). High Ct values indicate low transcript expression with the horizontal dotted  
 217 line corresponding to a Ct value of 35 or the reliable limit of detection. (b) Western blots showing expression  
 218 of NODAL and ALK4 (receptor) in four MSC lines. shControl and shNODAL MDA-MB-231 cells were used  
 219 as positive controls. (c) Serum-starved MSCs treated with varying concentrations of rhNODAL had no effect  
 220 on downstream SMAD2 (p-SMAD2) or ERK1/2 (p-ERK1/2) activation. TGF- $\beta$  treatment and cell culture  
 221 media were used as positive controls for SMAD2 and ERK1/2 activation, respectively. (d) Stimulation of  
 222 HFFs with rhNODAL activates SMAD2 and ERK1/2 phosphorylation in a dose-dependent fashion. Western  
 223 blots are representative images taken from three biological replicates.

224

## 225 Modulation of NODAL expression alters the breast cancer secretome

226 Mass spectrometry is a powerful tool for proteomic characterization of cancer cell lines and  
 227 tissues<sup>57,58</sup>. To further elucidate the mechanisms through which NODAL may influence stromal

228 cells, we employed high-resolution mass spectrometry to identify NODAL-regulated factors in  
229 serum-free CM from breast cancer cells. Stable isotopic labelling of amino acids in culture (SILAC)  
230 was combined with SDS-PAGE fractionation to determine relative changes in secreted proteins  
231 from shControl and shNODAL MDA-MB-231 cells. In total, this approach identified over 3200  
232 proteins, which were reduced to ~1300 entries after filtering for proteins annotated with Gene  
233 Ontology Cellular Component (GOCC) terms containing “extracellular” and quantified in at least  
234 two out of three biological replicates (**Fig. 5a, Sup. Table 2**). Of those, 122 proteins were  
235 significantly different ( $p < 0.05$ ) between shControl and shNODAL CM (**Fig. 5a, Sup. Table 2**).  
236 From this list, 1D annotation enrichment in Perseus revealed a significant decrease in proteins  
237 involved in GO Biological Processes (GOBPs) associated with cell migration, inflammation and  
238 cytokine signalling following NODAL knockdown (**Fig. 5b, Sup. Table 3**)<sup>59</sup>. Alternatively, proteins  
239 matching to GOBP terms mRNA processes, protein localization and macromolecular complex  
240 disassembly were significantly increased. This observation was attributed to higher levels of  
241 ribosomal proteins (RPS and RPL members) shed by shNODAL MDA-MB-231 cells. We plotted  
242 Heavy/Light ratios (shNODAL/shControl) and their corresponding  $-\log_{10}$  p-values for the ~1300  
243 filtered extracellular proteins found in MDA-MB-231 CM (**Fig. 5c**). All proteins annotated with the  
244 aforementioned GOBP terms were highlighted in blue (depleted) or red (enriched); there was a  
245 clear trend towards a reduction in the secretion of inflammatory and chemotactic proteins  
246 following NODAL knockdown and an opposing increase in transcriptional and translational  
247 proteins. CXCL chemokines (CXCL1/3/8), IL-6 and CSF1 were significantly lower in shNODAL  
248 CM ( $p < 0.05$ ). Interleukin 11 (IL-11), on the other hand, was significantly higher (~1.85 fold,  
249  $p < 0.05$ ). These factors have been associated with malignant phenotypes and may contribute to  
250 MSC chemotaxis given that they can promote chemotaxis of various immune cells and, in some  
251 cases, MSCs<sup>60-62</sup>. Similar to previous findings, PDGFA was significantly lower in shNODAL CM (-  
252 2.31 fold)<sup>45</sup>. Proteomic findings were verified by ELISAs with CM from MDA-MB-231 cells for

253 CXCL1, CXCL8, IL-6 and CSF1 (**Sup. Fig. 2a**). These results suggest that NODAL expression is  
254 associated with the secretion of inflammatory and chemotactic proteins by breast cancer cells.

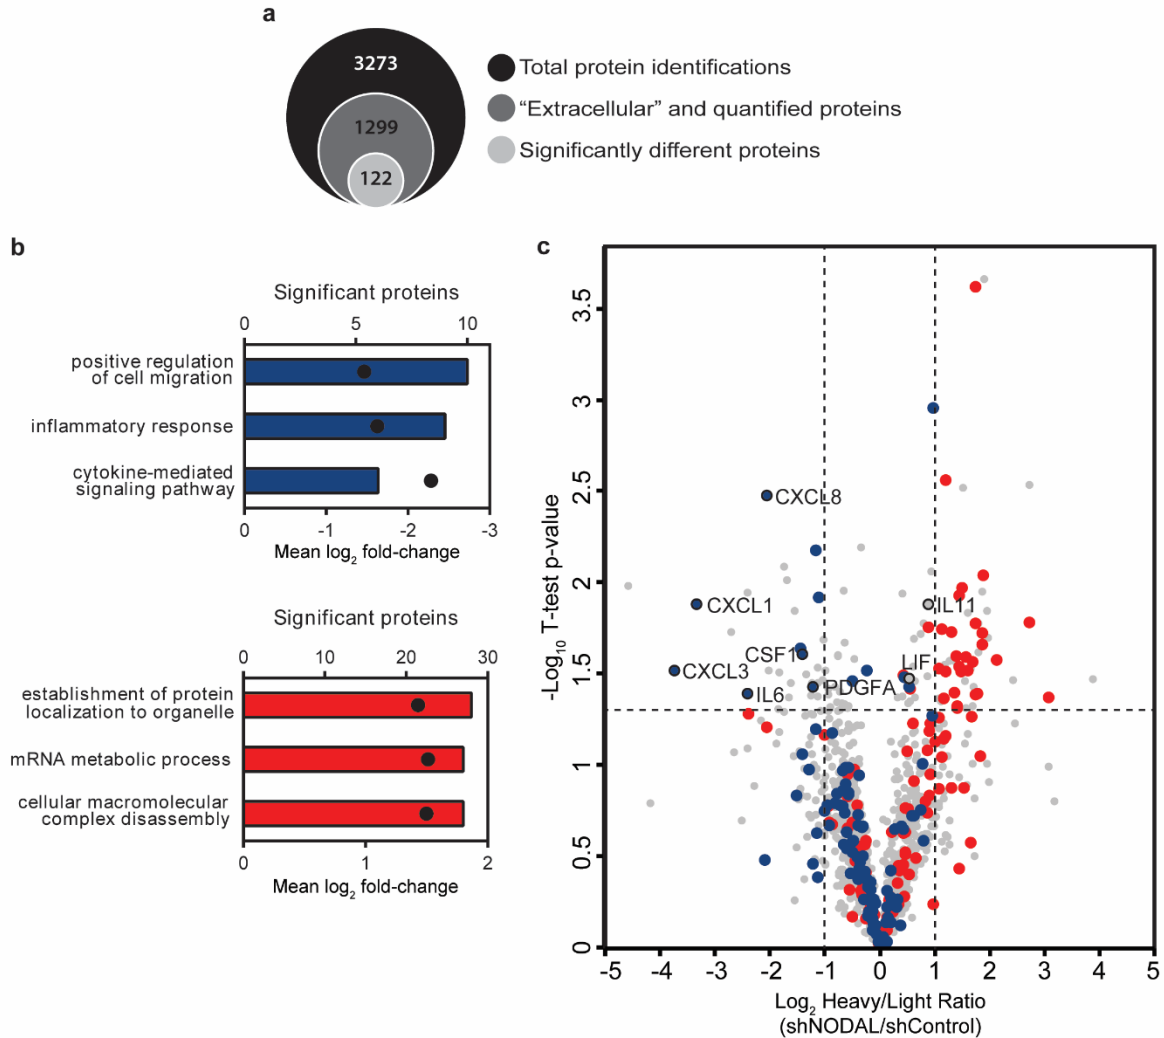

255

256 **Figure 5. NODAL knockdown alters the MDA-MB-231 secretome.** Extracellular proteins from serum-free  
257 shControl and shNODAL CM were analyzed by high-resolution mass spectrometry. **(a)** Venn diagram  
258 highlighting total protein identifications, number of “extracellular” and quantified proteins, and significantly  
259 different proteins between shControl and shNODAL CM (two-tailed, one sample t-test,  $p < 0.05$ ). **(b)** Number  
260 of significant proteins (bars) matching to a subset of significantly enriched (Benjamini Hochberg (BH) FDR  
261 threshold  $< 0.02$ ) GO biological processes (GOBPs). Mean log<sub>2</sub> fold-changes in GOBPs are indicated by  
262 black dots. Blue and red bars highlight GOBPs decreased and increased in MDA-MB-231 CM following  
263 NODAL knockdown, respectively. **(c)** Volcano plot of quantified “extracellular” proteins. Negative and  
264 positive Log<sub>2</sub> Heavy/Light ratios indicate proteins decreased and increased in MDA-MB-231 CM following  
265 NODAL knockdown, respectively ( $n=3$ ). All proteins matching to corresponding GOBPs mentioned are

266 highlighted in blue and red. Several cytokines and chemokines altered by NODAL are labelled in black.  
267 Vertical and horizontal dotted lines indicate  $\log_2$  fold-changes  $\geq 2$  and the  $-\log_{10}$  p-value cut-off  
268 corresponding to  $p < 0.05$ , respectively.

269

## 270 **IL-6 promotes MSC chemotaxis**

271 Given that NODAL consistently altered CXCL1 and IL-6 levels in MDA-MB-231 CM, which were  
272 associated with differential MSC chemotaxis, we sought to determine whether receptors for these  
273 ligands were expressed by MSCs. While three MSC lines were highly positive for IL-6R based on  
274 flow cytometry (**Fig. 6a**; **Sup. Fig. 3a, b**), surface CXCR1 and CXCR2 expression could not be  
275 detected in any of the MSC lines by real-time PCR or flow cytometry (**Sup. Fig. 3c**; data not  
276 shown). Accordingly, treatment with 10 and 25ng/mL recombinant human IL-6 (rhIL-6) induced  
277 STAT3 phosphorylation in MSC2 cells, which could be blocked by the addition of an IL-6  
278 neutralizing monoclonal antibody (mAb, **Fig. 6b**). Moreover, low doses of rhIL-6 (1 and 10ng/mL)  
279 significantly increased MSC2 chemotaxis by  $\sim 1.6$  fold ( $p < 0.05$ ) although higher concentrations  
280 had no effect (**Fig. 6c**). Neutralizing IL-6 in shControl CM resulted in a small, but significant,  
281 decrease in MSC2 chemotaxis (Fig. 6d), while supplementing shNODAL CM with rhIL-6 (1ng/mL)  
282 increased MSC2 chemotaxis (**Fig. 6e**). These findings suggest that IL-6 may be involved in  
283 promoting MSC recruitment to breast cancers.



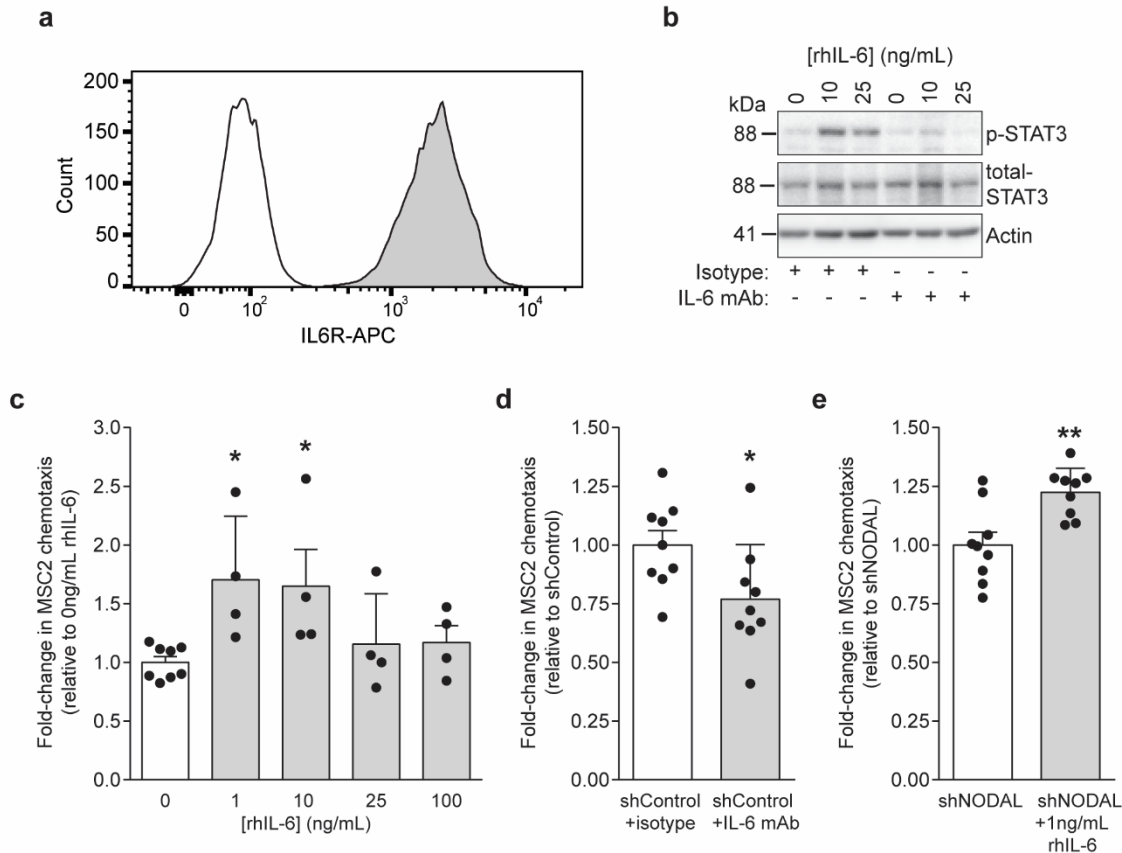

284

285 **Figure 6. IL-6 contributes to MDA-MB-231 mediated MSC chemotaxis.** (a) Flow cytometry showing  
 286 nearly homogenous expression of the IL-6 receptor (IL-6R) by MSCs. (b) Stimulation with rhIL-6 induced  
 287 phosphorylation of STAT3 in MSC2, which could be blocked by pre-incubation with an IL-6 neutralizing  
 288 mAb. (c) MSC chemotaxis towards rhIL-6 after 24h (n=4-8). Low concentrations (1-10ng/mL) of rhIL-6  
 289 significantly induced MSC chemotaxis (Dunnett's multiple comparison test, \*p<0.05). (d) IL-6 neutralizing  
 290 mAb significantly attenuated MSC chemotaxis. (e) Exogenous rhIL-6 significantly increased MSC  
 291 chemotaxis towards shNODAL CM. Flow histogram and western blots are representative images from  
 292 three biological replicates. Data are presented as mean fold-changes relative to controls  $\pm$  SD. Black dots  
 293 indicate replicate values and asterisks indicate significance differences (one-way ANOVA, Dunnett's  
 294 multiple comparison test for IL-6 dose response and two-tailed, two sample t-test for MDA-MB-231  
 295 treatments) in MSC chemotaxis compared to controls (\* p<0.05, \*\* p<0.01).

296

## 297 NODAL-induced reprogramming of the breast cancer secretome is context-dependent

298 NODAL/ACTIVIN regulates cell fate specification and phenotype by activating signal transduction  
 299 pathways that directly affect transcription and mediate epigenetic modifications<sup>63</sup>. The ability of

300 NODAL to broadly affect gene expression is context-dependent. Given that inflammatory breast  
301 cancer is marked by a discrete TME composition and function<sup>64</sup>, tumour cells and TME  
302 components in this breast cancer subtype may well cooperate under distinct cellular and signalling  
303 contexts. Therefore, we investigated the impact of NODAL on the secretome of SUM149 triple  
304 negative inflammatory breast cancer cells, which express low levels of NODAL, to determine if it  
305 differs from that of MDA-MB-231 cells.

306 In contrast to the knockdown model previously employed in MDA-MB-231 cells, we generated  
307 NODAL-overexpressing and green fluorescent protein (GFP) control SUM149 cells from which  
308 Strong Cation Exchange (SCX)-fractionated CM digests were obtained for label-free quantitative  
309 proteomics (**Fig. 7a**). Approximately 1500 proteins were annotated as “extracellular” and  
310 quantified in at least two out of three biological replicates, and 344 proteins were significantly  
311 different between NODAL and GFP expressing SUM149 cells (**Fig. 7b, Sup. Table 4**). GOBPs  
312 that were significantly enriched or depleted included terms associated with inflammation, cell  
313 migration/locomotion, translation, and transcription (**Fig. 7c, Sup. Table 5**). Unexpectedly,  
314 GOBPs depleted in shNODAL MDA-MB-231 samples were also depleted in NODAL  
315 overexpressing SUM149 CM. For instance, proteins matching the cytokine-mediated signalling  
316 pathway had a mean  $\log_2$  fold-change of -2.28 and -2.44 following NODAL knockdown and  
317 overexpression, respectively (**Fig. 5b and 7c**). Conversely, proteins matching “mRNA metabolic  
318 process” were increased significantly by NODAL knockdown in MDA-MB-231 and NODAL  
319 overexpression in SUM149 with mean  $\log_2$  fold-changes of 1.51 and 1.88, respectively. We also  
320 plotted  $\log_2$  protein fold-changes for SUM149 secretomes (NODAL-GFP) versus  $-\log_{10}$  p-values  
321 and highlighted all proteins annotated with the aforementioned GOBPs (**Fig. 7d**). Several  
322 inflammatory and migratory factors decreased following NODAL overexpression while  
323 translational and transcriptional proteins were elevated. As in NODAL knockdown in MDA-MB-  
324 231 cells, CXCL1, CXCL3, IL-6 and CSF1 levels also decreased following NODAL

325 overexpression in SUM149 cells. Highly similar proteomic results were also observed when  
326 comparing CM from NODAL overexpressing SUM149 cells to cells expressing an empty vector  
327 (EV) (**Sup. Fig. 4 and Sup. Tables 6 and 7**). In total, 56 proteins were significantly altered by  
328 NODAL in both MDA-MB-231 and SUM149 datasets; however, only a handful were associated  
329 with NODAL expression in a positive (CLU and CLSTN3) and negative (leukemia inhibitory factor  
330 [LIF] and neuropillin-2 [NRP2]) manner in both cell lines. Moreover, NODAL promoted a pro-  
331 angiogenic phenotype in both MDA-MB-231 and SUM149 cells. For example, although PDGFA  
332 was not detected in SUM149 CM, the angiogenic factors angiopoietin-1 (ANGPT1) and  
333 angiogenin (ANG) were significantly elevated in CM from NODAL-overexpressing SUM149 cells  
334 (Fig. 7d, Sup. Tables 4 and 6)<sup>65,66</sup>.

335 In accordance with NODAL's ability to directly activate fibroblasts, CM from NODAL  
336 overexpressing SUM149 cells significantly increased HFF chemotaxis compared to the GFP  
337 expressing control (**Fig. 7e**). Furthermore, in line with results suggesting that NODAL affects MSC  
338 chemotaxis indirectly by reprogramming the breast cancer secretome, CM derived from NODAL  
339 overexpressing SUM149 cells induced less chemotaxis in MSC2 cells compared to CM from the  
340 GFP expressing control cells (**Fig. 7f**). This reduced chemotaxis is likely attributable to lower  
341 levels of cytokines such as IL-6. Again, we confirmed by flow cytometry that differences in  
342 chemotaxis were not due to altered proliferation or viability (**Sup. Fig. 1b**; data not shown).

343 In a Venn diagram to assess relationships among differentially expressed proteins from MDA-  
344 MB-231, HDF, and SUM149 proteomics and microarray datasets, we found several factors  
345 consistently altered by NODAL, albeit some inversely correlated with NODAL levels (**Fig. 7g**). IL-  
346 6, LIF, and NRP2 were shared amongst all three datasets; however, CXCL1/3 appeared to be  
347 exclusively modulated in breast cancer cells. Hence, while NODAL indirectly affects MSC  
348 chemotaxis by altering the breast cancer secretome, NODAL can directly induce fibroblast

349 activation. Moreover, certain key factors, such as IL-6 and LIF, are commonly affected by NODAL  
 350 in all cell types investigated here.

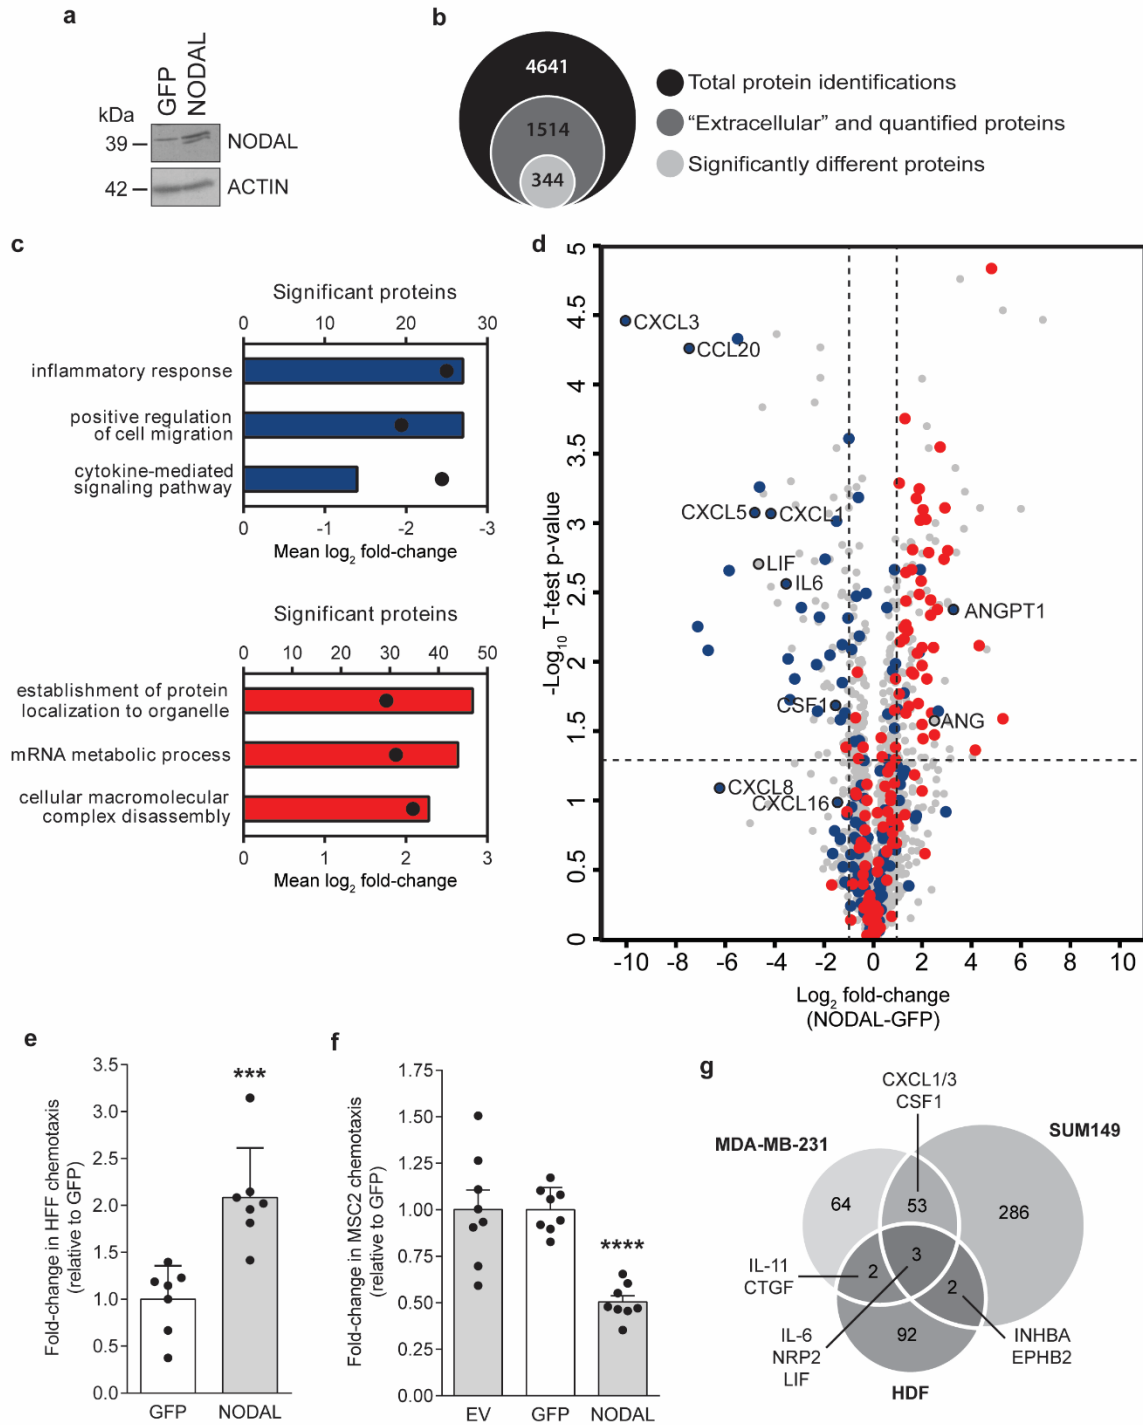

351

352 **Figure 7. NODAL overexpression alters the SUM149 secretome and affects HFF and MSC**  
353 **chemotaxis. (a)** NODAL expression in GFP- or NODAL-overexpressing SUM149 breast cancer cells.  
354 Extracellular proteins from serum-free CM (GFP or NODAL) were analyzed by mass spectrometry. **(b)** Venn  
355 diagram highlighting total protein identifications, “extracellular” and quantified proteins, and significantly  
356 different proteins between GFP and NODAL CM (two-tailed, two sample t-test,  $p < 0.05$ ). **(c)** Number of  
357 significant proteins (bars) matching to subset of significantly enriched GOBPs (BH FDR threshold  $< 0.02$ ).  
358 Mean  $\log_2$  fold-changes in GOBPs are indicated by black dots. Blue and red bars highlight GOBPs  
359 decreased and increased in SUM149 CM following NODAL overexpression, respectively. **(d)** Volcano plot  
360 of quantified “extracellular” proteins. Negative and positive  $\log_2$  fold-changes indicate proteins decreased  
361 and increased in SUM149 CM following NODAL overexpression, respectively ( $n = 3$ ). All proteins matching  
362 to corresponding GOBPs mentioned are highlighted in blue and red. Several cytokines, chemokines and  
363 growth factors altered by NODAL are labelled in black. Vertical and horizontal dotted lines indicate  $\log_2$  fold-  
364 changes  $\geq 2$  and the  $-\log_{10}$  p-value cut-off corresponding to  $p < 0.05$ , respectively. **(e)** NODAL  
365 overexpression increased HFF chemotaxis towards CM from SUM149 cells compared to GFP control ( $n = 6$ );  
366 Two-sample t-test,  $***p < 0.001$ . **(f)** CM from NODAL-overexpressing SUM149 cells decreased MSC  
367 chemotaxis compared to empty vector (EV) and GFP controls. Data are presented as mean fold-changes  
368 relative to controls from a minimum of three biological replicates  $\pm$  SD. Black dots indicate replicate values  
369 and asterisks indicate significance differences (one-way ANOVA, Dunnett’s multiple comparison test) in  
370 MSC chemotaxis compared controls ( $*** p < 0.001$ ,  $**** p < 0.0001$ ). **(g)** Overlap in proteins differentially  
371 expressed (increased or decreased) in MDA-MB-231 (shControl versus shNODAL), SUM149 (NODAL  
372 versus GFP) and HDF (rhNODAL-treated versus untreated) datasets.

373

#### 374 **Differential signalling pathways may dictate cell type-dependent effects of NODAL**

375 Our data demonstrate that the effects of NODAL are highly context-dependent. These differential  
376 responses may be due, in part, to which signal transduction pathways NODAL induces. Indeed,  
377 ELISAs showed that CXCL1 and IL-6 levels were substantially higher in GFP expressing SUM149  
378 cells compared to MDA-MB-231 cell lines grown to similar confluence (**Sup. Fig. 2b, c**),  
379 suggesting different regulatory mechanisms between these cell lines. Canonically, NODAL  
380 triggers phosphorylation of SMAD2/3 via binding to its receptors ActRIIB/ALK(4/7) and co-  
381 receptor CRIPTO<sup>67</sup>. Phospho-SMAD2/3-SMAD4 heterodimers subsequently translocate into the  
382 nucleus to regulate the epigenetic status and transcription of target genes. NODAL can also signal

383 non-canonically to activate ERK1/2, which is required for the induction of epithelial-mesenchymal  
384 transition (EMT) and invasion<sup>49</sup>.

385 Given the disparate effects of NODAL on cytokine secretion in MDA-MB-231 versus SUM149  
386 cells, we hypothesized that NODAL may activate different signalling mediators like TGF- $\beta$  in a  
387 cell-type dependent manner<sup>68,69</sup>. Accordingly, the activation of two documented mediators of  
388 NODAL signalling (SMAD2/3 and ERK1/2) were measured by western blotting in breast cancer  
389 cells wherein NODAL levels had been modified (**Fig. 8**). NODAL knockdown in MDA-MB-231  
390 resulted in an expected and previously described reduction in both SMAD2/3 and ERK1/2  
391 phosphorylation<sup>49</sup>. While overexpression of NODAL in SUM149 increased SMAD2  
392 phosphorylation, a small reduction in ERK1/2 phosphorylation was observed. Moreover,  
393 constitutive SMAD2 activation was higher, while ERK1/2 was lower in SUM149 compared to  
394 MDA-MB-231 cells. Finally, we examined STAT3 activation, which occurs downstream of IL-6. In  
395 accordance with reduced IL-6 levels, NODAL knockdown reduced STAT3 phosphorylation in  
396 MDA-MB-231 cells. However, NODAL overexpression did not appear to affect STAT3 activation  
397 in SUM149 cells, perhaps due to the highly inflammatory nature of this cell line. These results  
398 suggest that some of the observed cell-type-specific effects of NODAL may relate to differential  
399 levels of SMAD2/3 and ERK1/2 activation induced by this ligand; MDA-MB-231 cells have higher  
400 ERK1/2 and lower SMAD2/3 basal activation compared to SUM149 cells. Hence, NODAL may  
401 preferentially signal through SMAD2/3 in SUM149 and ERK1/2 in MDA-MB-231 cells.

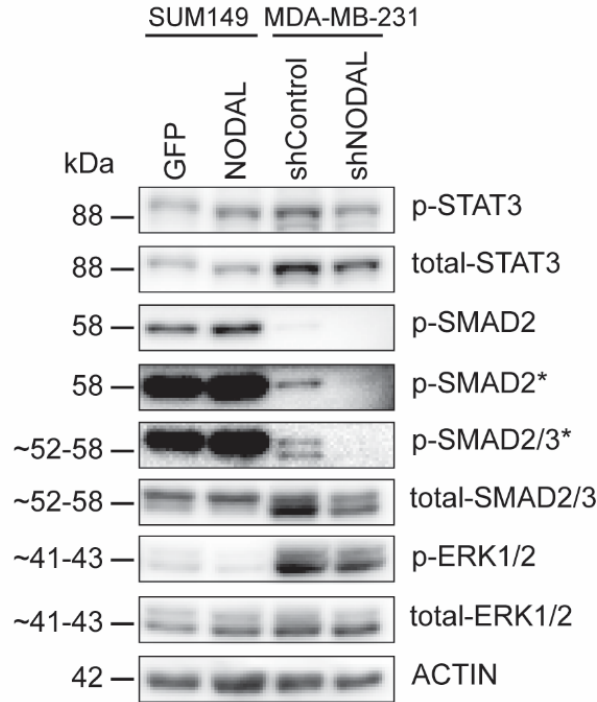

402

403 **Figure 8. Effects of NODAL manipulation on signalling pathways in MDA-MB-231 and SUM149 cells.**

404 Western blotting revealed similarities and differences in activation of downstream pathways. NODAL  
405 expression (NODAL and shControl cell lines) was associated with increased phosphorylation of STAT3,  
406 SMAD2 and SMAD3. Basal levels of p-SMAD2 and p-ERK1/2 were substantially higher in SUM149 and  
407 MDA-MB-231 cell lines, respectively. p-ERK1/2 decreased slightly following NODAL overexpression in  
408 SUM149 cells. Western blots are representative images taken from three biological replicates and asterisks  
409 denote high contrast image settings.

410

411 **Discussion**

412 The TME facilitates pro-tumourigenic processes, among which fibroblast activation – a common  
413 trait of many cancers, including breast carcinomas<sup>70,71</sup> – plays an important role. Many factors  
414 activate fibroblasts, such as TGF- $\beta$ , CXCL12/SDF-1, PDGFA/B, and IL-6<sup>72-74</sup>. NODAL has been  
415 shown to directly induce migration and invasion of breast, pancreatic, and hepatocellular cancer  
416 cell lines *in vitro*<sup>43,49,75</sup>. Moreover, ectopic overexpression of NODAL in breast cancer cells  
417 indirectly promotes endothelial tube formation by increasing the expression of pro-angiogenic

418 proteins such as PDGFA<sup>45</sup>. Recent efforts have shown that NODAL alters breast cancer cell  
419 susceptibility to  $\gamma\delta$  T cell killing by acting on cancer cells to decrease recognizable antigens on  
420 the cell surface. Furthermore, long-term NODAL stimulation reduced V $\delta$ 2 T cell antigen receptor  
421 expression, suggesting activation of an as-of-yet unidentified signaling pathway in primary  $\gamma\delta$  T  
422 cells<sup>50</sup>. We build upon these studies by showing that NODAL may affect TME function and  
423 composition directly or indirectly by broadly regulating the breast cancer secretome. Specifically,  
424 we show that NODAL activates fibroblasts directly, but that it affects MSC chemotaxis indirectly,  
425 by reprogramming breast cancer cell secretomes.

426 We have shown herein that cells expressing the CAF marker  $\alpha$ -SMA are spatially  
427 correlated with NODAL-positive cancer cells in human TNBC tissues, and that NODAL expression  
428 levels positively correlate to those of stromal  $\alpha$ -SMA in these tissues. We demonstrate for the first  
429 time that NODAL signals directly on fibroblasts to induce an activated phenotype, characterized  
430 by increased proliferation rates, invasive capacity, and the expression of transcripts of known  
431 CAF markers. The origin of CAFs has been extensively debated over the years<sup>76-79</sup>, with evidence  
432 pointing to diverse sources such as resident tissue fibroblasts, bone marrow-derived MSCs,  
433 hematopoietic stem cells, epithelial cells that undergo epithelial-mesenchymal transition, and  
434 endothelial cells. A recent study has shown that the MDA-MB-231, but not MCF-7, secretome  
435 activates MSCs, converting them into tumour-associated MSCs<sup>80</sup>. We similarly show that  
436 although MSCs are unable to sense and respond to NODAL signals, they still undergo chemotaxis  
437 toward the NODAL-regulated breast cancer cell secretome.

438 Our robust proteomics approach allowed us to uncover dozens of secreted proteins that  
439 are affected by NODAL expression in breast cancer cells and may impact MSC recruitment to the  
440 breast TME. For these studies, we knocked down NODAL in claudin-low MDA-MB-231 cells that  
441 express high basal levels of NODAL, and overexpressed NODAL in SUM149, which represent  
442 inflammatory breast cancer cells and express low levels of NODAL. Consistent with the effects of



443 NODAL *in vitro* and *in vivo*, the levels of several pro-angiogenic factors (PDGFA, ANGPT1, and  
444 ANG) in breast cancer CM were positively correlated with its expression<sup>45</sup>. However, we also  
445 made the seemingly paradoxical discovery that the expression of NODAL in MDA-MB-231 and  
446 SUM149 breast cancer cells oppositely regulates cytokines involved in chemotaxis. This  
447 difference may be coincident with the models chosen: MDA-MB-231 express relatively low levels  
448 of pro-inflammatory cytokines compared to SUM149, and thus the epigenetic regulation of the  
449 genes encoding these proteins may vary dramatically between the two cells lines.

450 Our discordant results are not uncommon for studies involving members of the TGF- $\beta$   
451 family, which function in a context-dependent manner. TGF- $\beta$ 1, for example, induces IL-6  
452 production in PC3 and DU145 prostate cancer cells *via* SMAD2/TGFBRII and p38 MAPK<sup>81</sup>.  
453 Moreover, in MDA-MB-231 and MDA-MB-468 breast cancer cells, TGF- $\beta$ 1 stimulates IL-8  
454 (CXCL8) and IL-11 secretion *via* SMAD3/TGFBRI and p38 MAPK<sup>82</sup>. However, in the  
455 Polyomavirus middle T antigen transformed mouse mammary carcinoma model, loss of TGF- $\beta$   
456 signalling results in the upregulation of CXCL1, CXCL5, and CCL20<sup>83</sup>. Remarkably, these factors  
457 decreased substantially in SUM149 CM following NODAL overexpression (**Sup. Tables 4 and 6**),  
458 thus suggesting negative regulatory roles for both NODAL and TGF- $\beta$ . We did not observe  
459 significant differences in the levels of TGF- $\beta$ 1/2 between breast cancer lines (Sup. Tables 2, 4  
460 and 6), hence the effects of NODAL were not likely mediated *via* alterations in TGF- $\beta$ 1/2. Taken  
461 together, both NODAL and TGF- $\beta$  may differentially regulate chemokine and cytokine expression  
462 in cancer, depending on the context. This difference should be considered as treatment modalities  
463 designed to target these pathways evolve<sup>84</sup>.

464 Genes regulated by NODAL appear to be dictated, at least in part, by the accessibility of  
465 genomic regions, and NODAL induces histone modifications to affect gene expression<sup>85</sup>. Hence  
466 the differential effects of NODAL in MDA-MB-231 versus SUM149 cells may be due to differences  
467 in chromatin accessibility in the areas surrounding chemotactic and inflammatory cytokines. The

468 differences observed may also be due to the ability of NODAL to activate ERK signaling in MDA-  
469 MB-231 cells but not in SUM149 cells. Several studies have demonstrated the role of ERK  
470 signaling in the upregulation of inflammatory cytokines such as IL-6<sup>86,87</sup>. Hence the effects of  
471 NODAL knockdown in MDA-MB-231 cells may be due to reduced ERK signalling.

472 While IL-6R was detected on MSC, CXCR1 and CXCR2 were not. Heterogeneity in MSC  
473 receptor expression has been reported in multiple studies and may be a product of culture  
474 conditions and donor heterogeneity<sup>88,89</sup>. For reference, Ponte *et al.* observed CXCR4 and CXCR5  
475 but not CXCR1 or CXCR2 on human BM-MSC<sup>90</sup>. Chamberlain *et al.* also reported high expression  
476 for CXCR4 and CXCR5 but low to intermediate expression of CXCR1 and CXCR2, respectively<sup>91</sup>.  
477 Conversely, Ringe *et al.* extensively profiled chemokine receptors on human BM-MSC and  
478 detected CXCR1 and CXCR2 but noted loss of expression following ten passages<sup>92</sup>. While these  
479 pathways may play a role in MSC recruitment to tumours in breast cancer patients, we were  
480 unable to test this possibility.

481 In our hands, MDA-MB-231 cells produced less IL-6 and CXCL1 than those studied by  
482 Hartman *et al.*, who investigated the role of cytokines in TNBC cell growth<sup>60</sup>. Notwithstanding,  
483 neutralizing IL-6 in MDA-MB-231 CM was sufficient to attenuate MSC chemotaxis<sup>29,93,94</sup>. We did  
484 not neutralize IL-6 in SUM149 CM; however, CM from either SUM149 or SUM159 breast cancer  
485 cells was previously shown to promote migration of aldehyde dehydrogenase-high MSC or  
486 macrophage-educated MSC in an IL-6 dependent manner<sup>62,94</sup>.

487 Although CXCR1/2 was not detected on MSC, differences in CXCL1 and CXCL8 levels  
488 following NODAL knockdown/overexpression remain important for cancer progression and  
489 trafficking of additional cell types and justify additional interrogation. For instance, CXCL1-  
490 mediated recruitment of CD11b+Gr1+ myeloid cells enhanced breast cancer cell survival,  
491 chemoresistance, and metastasis<sup>61</sup>. Moreover, obesity-associated CXCL1 expression in prostate  
492 tumours was linked to adipose-derived stromal cell migration *in vitro* and tumour engraftment *in*

493 *vivo*<sup>95</sup>. Given the importance of NODAL-regulated cytokines in the TME, future studies  
494 interrogating the extent to which NODAL may modulate TME composition are warranted.

495 In summary, we demonstrate that NODAL directly activates stromal fibroblasts and that it  
496 reshapes the breast cancer secretome, affecting the deposition of factors such as IL-6, which may  
497 regulate the recruitment of MSCs, as well as other TME cell types (**Fig. 9**). Expanding our previous  
498 discovery that NODAL induces secretion of PDGF and VEGF by breast cancer cells, our present  
499 findings illuminate a hitherto unappreciated role for NODAL in the orchestration of the tumour  
500 microenvironment.

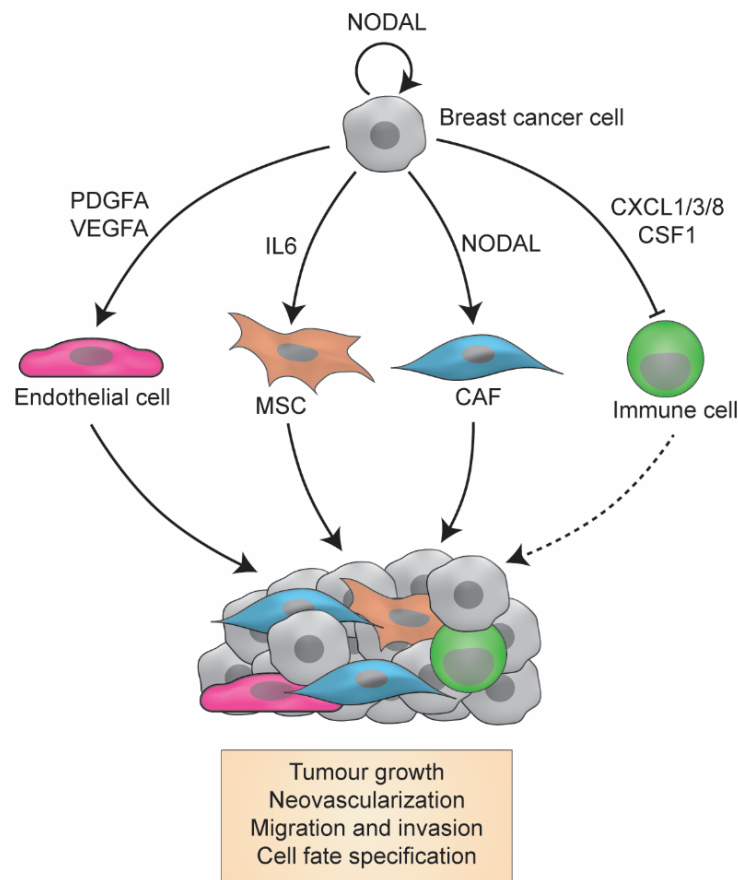

501

502 **Figure 9. Proposed model for NODAL signalling in the breast cancer microenvironment.** NODAL  
503 signals directly to breast cancer cells and CAFs, and indirectly regulates secretion of inflammatory,  
504 chemotactic and angiogenic factors by breast cancer cells, which act on endothelial and mesenchymal  
505 stromal cells and possibly immune cell types. Collectively, NODAL promotes tumorigenic phenotypes  
506 including tumour growth, neovascularization, cell migration and cell fate specification.

## 507 **Materials and Methods**

### 508 **Patients and Tissues**

509 We assessed 41 samples from 20 surgically resected TNBC tumors from cancer patients  
510 diagnosed at the Cross Cancer Institute, Edmonton, AB in 2017. This study was carried out in  
511 accordance with the recommendations of the Research Ethics Guidelines, Health Research  
512 Ethics Board of Alberta – Cancer Committee with written informed consent from all subjects. All  
513 subjects gave written informed consent in accordance with the Declaration of Helsinki.

514

### 515 **Immunohistochemistry**

516 NODAL and  $\alpha$ -SMA staining in TNBC tissues was performed as previously described for  
517 NODAL<sup>45</sup>. Briefly, tissue sections were deparaffinized in xylene and hydrated in graded ethanol.  
518 Antigen retrieval was performed with citrate buffer pH 6.0, followed by peroxidase and serum-free  
519 protein blocking. After incubation with primary antibodies (**Sup. Table 8**), slides were rinsed in  
520 TBS-T and treated with Envison+ HRP anti-mouse IgG (Dako, Glostrup, Denmark). Color was  
521 produced with 3,3'-Diaminobenzidine (DAB) substrate and counterstained with Mayer's  
522 haematoxylin. Samples were dehydrated in graded alcohol and cover slipped with permanent  
523 mounting medium.

524

### 525 **Evaluation of NODAL and $\alpha$ -SMA staining**

526 Light microscopy and semi-quantitative scoring were performed by two pathologists. The entirety  
527 of each slide was assessed. Scores for NODAL were 0, absent; 1, weak or very focal staining; 2,  
528 strong but focal or moderate intensity; and 3, strong and extensive staining. The score reflects  
529 the intensity of staining observed in the majority of cells. When scored 1-3, NODAL distribution  
530 was further identified as focal, diffuse or scattered, and an estimated proportion of tumour cells  
531 staining with NODAL was calculated (NODAL percentage in Table I).  $\alpha$ -SMA was scored in the

532 same manner on serial sections from the same cases. Intensity association was measured based  
533 on the extent to which  $\alpha$ -SMA staining was increased in areas with NODAL-positive cells.  
534 Representative images were taken from a Nikon DS U3 camera on Nikon eclipse 80i microscope  
535 (Nikon, Tokyo, Japan) at 400 x (500 px bar = 40  $\mu$ m).

536

### 537 **Cell culture**

538 MDA-MB-231 cells stably expressing scrambled control (shControl) or NODAL targeting  
539 (shNODAL) short hairpin RNAs as previously described and validated<sup>45,48,49</sup> were maintained in  
540 DMEM/F12 (Gibco, Waltham, MA) supplemented with 10% FBS (Gibco) and 500ng/mL  
541 puromycin. To generate SUM149 cells stably expressing an empty vector (EV), green fluorescent  
542 protein (GFP) or NODAL, cells were transduced with lentiviral particles (GeneCopoeia, Rockville,  
543 MD) overnight then selected and maintained in HAM's F10 (Gibco) supplemented with 10% FBS,  
544 5 $\mu$ g/mL insulin (Santa Cruz Biotechnology, Dallas, TX), 1 $\mu$ g/mL hydrocortisone (Sigma-Aldrich,  
545 St. Louis, MO) and 100 ng/mL puromycin. Human BM-MSC lines were maintained in  
546 AmnioMAX™ with C100 supplement (Life Technologies, Carlsbad, CA); these lines were  
547 previously confirmed to express characteristic stromal markers (>95% CD90+, CD105+, and  
548 CD73+) and exhibit multipotent differentiation<sup>56,96</sup>. HFFs (Cascade Biologics, Portland, OR) were  
549 maintained in DMEM/F12 supplemented with 10% FBS and HDFs (ATCC, Manassas, VA) in  
550 DMEM supplemented with 10% FBS. For SILAC labelling, shControl and shNODAL MDA-MB-  
551 231 cells were cultured in DMEM F12 supplemented with dialyzed FBS (Life Technologies)  
552 containing light (Advanced ChemTech, Louisville, KY) or heavy (Cambridge Isotope Laboratories,  
553 Tewksbury, MA and Silantes GmbH, Germany) isotopes of arginine (0.398mM) and lysine  
554 (0.274mM) for at least nine days to achieve >90% label incorporation. SILAC media was  
555 additionally supplemented with 400 mg/L of proline (Sigma-Aldrich) to limit arginine to proline  
556 conversion<sup>97</sup>. CM was prepared by plating equal cell numbers onto flasks in culture media  
557 (Corning, Corning, NY). After 24h (MDA-MB-231 cells) or 48h (SUM149 cells), media was

558 removed, and cells were thoroughly rinsed three times in PBS (with Ca<sup>2+</sup> and Mg<sup>2+</sup>) to remove  
559 serum components. Cells were incubated in serum-free media (SFM) with 0.5% BSA for an  
560 additional 24h to generate CM (BSA was omitted for LC-MS samples). Conditions used to  
561 stimulate cells with rhNODAL and rhIL-6 are specified in the main text.

562

### 563 **Sample preparation for liquid chromatography-mass spectrometry (LC-MS)**

564 CM (without BSA) were concentrated using 3 kDa molecular weight cut-off (MWCO) Amicon  
565 ultracentrifugal units (Millipore, Burlington, MA) and lyophilized overnight. The following day, CM  
566 was reconstituted in lysis buffer (8M urea, 50mM ammonium bicarbonate, 10mM dithiothreitol and  
567 2% SDS), sonicated (3 X 0.5s pulses) with a probe sonicator (Level 1; Fisher Scientific, Waltham,  
568 MA) and quantified using a Pierce™ 660 nm assay (Thermo Fisher Scientific, Waltham, MA) with  
569 ionic detergent compatibility reagent. For SILAC samples, light shControl and heavy shNODAL  
570 CM were pooled based on equal cell numbers and ~100µg protein were fractionated using SDS-  
571 PAGE on 12% acrylamide tris-glycine gels. In-gel digestion with trypsin (1:25 enzyme:protein  
572 ratio) was performed on 16-17 slices (fractions) from each lane in biological triplicate as previously  
573 described<sup>98</sup>. For label-free samples, ~50µg protein from SUM149 CM were precipitated in  
574 chloroform/methanol, digested overnight with trypsin (1:50 ratio) on a water bath shaker and  
575 fractionated on SCX StageTips as previously described<sup>98-100</sup>. Peptides were dried in a SpeedVac,  
576 reconstituted in 0.1% formic acid (FA; Fisher Scientific) and a volume corresponding to 1/10th of  
577 the total material recovered or 1 µg as determined by bicinchoninic acid (BCA) assay (Pierce™,  
578 Waltham, MA) was injected for each in-gel and SCX fraction, respectively.

579

### 580 **LC-MS**

581 In-gel and SCX fractions were analyzed using a Q Exactive or Orbitrap Elite mass spectrometer  
582 (Thermo Fisher Scientific), respectively. Samples were injected using a nanoAcquity HPLC  
583 system (Waters, Milford, MA) and initially trapped on a Symmetry C18 Trap Column (5 µm, 180

584  $\mu\text{m} \times 20 \text{ mm}$ ) for 4 or 5 minutes in 99% Solvent A (Water/0.1% FA)/1% Solvent B  
585 (acetonitrile/0.1% FA) at a flow rate of 10  $\mu\text{l}/\text{min}$ . Peptides were separated on an ACQUITY  
586 Peptide BEH C18 Column (130Å, 1.7 $\mu\text{m}$ , 75 $\mu\text{m} \times 250\text{mm}$ ) at a flow rate of 300 nL/min maintained  
587 at 35°C. The LC-MS gradient for in-gel digests consisted of 1-7% B over 1 minute and 7-37.5%  
588 B over 79 minutes. SCX fractions were separated using gradient consisting of 7.5% B over 1  
589 minute, 25% B over 179 minutes, 32.5% B over 40 minutes and 60% B over 20 minutes. Column  
590 washing and re-equilibration was performed following each run and settings for data acquisition  
591 are outlined in **Sup. Table 9**.

592

### 593 **Data analysis and statistics**

594 Raw MS files were searched in MaxQuant (1.5.2.8) with the Human Uniprot database (reviewed  
595 only; updated May 2014 with 40,550 entries)<sup>101</sup>. Missed cleavages were set to 3 and I=L. Cysteine  
596 carbamidomethylation was set as a fixed modification. Oxidation (M), n-terminal acetylation  
597 (protein), and deamidation (NQ) were used as variable modifications (max. number of  
598 modifications per peptide = 5) and min ratio count was set to 1. All other settings were left at  
599 default. The match-between-runs feature was utilized to maximize proteome coverage and  
600 quantitation between samples. Datasets were loaded into Perseus<sup>59</sup> (version 1.5.5.3) and proteins  
601 identified by site, reverse and potential contaminants were removed<sup>59</sup>. Protein identifications with  
602 quantitative values in  $\geq 2$  biological replicates were retained for downstream analysis unless  
603 specified elsewhere. Missing values were imputed using a width of 0.3 and down shift of 1.8 for  
604 label free datasets. Statistical analysis was performed in Perseus or GraphPad Prism version  
605 6.01 (San Diego, CA). All experiments were carried in at least three biological replicates unless  
606 specified otherwise. Where specified, replicate treatment values were normalised to the control  
607 group and relative fold-changes were reported. Two-tailed, one sample and two-sample t-tests  
608 ( $p < 0.05$ ) were performed to determine statistical differences unless more than two conditions

609 were being compared and a one-way ANOVA using Dunnett's multiple comparison test ( $p < 0.05$ )  
610 was performed instead.

611

### 612 **Chemotaxis and invasion assays**

613 MSCs were rinsed in warm PBS (with  $\text{Ca}^{2+}$  and  $\text{Mg}^{2+}$ ) and serum starved for ~2h in  
614 AmnioMAX™ prior to dissociation with trypsin for chemotaxis assays. In parallel, 8 $\mu\text{M}$  transwells  
615 (Falcon®, Corning, NY) were coated with 10 $\mu\text{g}/\text{cm}^2$  of bovine fibronectin (Sigma-Aldrich) in 100 $\mu\text{L}$   
616 of PBS for 2h. After coating, excess solution was aspirated and 40K MSCs in 0.5mL of DMEM  
617 F12+0.5% BSA were plated in each transwell. HFFs were serum starved 24h prior to dissociation  
618 and plated at a density of 50K cells/transwell. For HFF chemotaxis and invasion assays,  
619 fibronectin and Matrigel™ (Corning) were omitted and included, respectively. To the bottom  
620 chamber, 1mL of DMEM/F12 + 0.5% BSA or CM was added +/- rhNODAL (R&D Systems,  
621 Minneapolis, MN), rhIL-6 (eBioscience, San Diego, CA), isotype or IL-6 neutralizing monoclonal  
622 antibodies (R&D Systems). After ~24h, transwells were rinsed in warm PBS and placed in cold  
623 methanol for 20 minutes to fix migrating cells. After fixing, transwells were rinsed in PBS and the  
624 inside membrane was thoroughly wiped with a cotton swab to remove non-migrated cells.  
625 Membranes were excised and mounted onto glass slides with ProLong™ Gold Antifade Mountant  
626 with DAPI (Invitrogen, Carlsbad, CA). Migrated cells were counted from at least 5-10 high power  
627 fields uniformly distributed across the entire membrane for each condition.

628

### 629 **Western blotting**

630 Cells were thoroughly washed with PBS (with  $\text{Ca}^{2+}$  and  $\text{Mg}^{2+}$ ) and directly lysed on tissue culture  
631 plates in lysis buffer. Lysates recovered by pipetting were sonicated with a probe sonicator (20 X  
632 0.5s pulses) to shear DNA and reduce viscosity. Equal protein amounts (15-25 $\mu\text{g}$ ) were separated  
633 on hand cast 8-20% acrylamide Tris-glycine gels then transferred to Immobilon-P® PVDF  
634 membranes (Millipore). Membranes were stained with amido black and rinsed in ddH<sub>2</sub>O for 5



635 minutes followed by blocking for 1h on rocker in 5% non-fat dry milk in TBST (Tris-buffered saline,  
636 0.1% Tween 20) and overnight incubation in primary antibody at 4°C. Chemiluminescent detection  
637 was performed using film or a VersaDoc CCD camera with Clarity™ Western ECL Substrate and  
638 horseradish peroxidase-conjugated secondary antibodies (Bio-Rad, Hercules, CA) the next day.  
639 Antibody information is available in **Sup. Table 8**. Actin and Tubulin were used as loading  
640 controls. PVDF membranes were stippled in 0.2 M NaOH and re-probed when possible, otherwise  
641 western blots were run in duplicate.

642

### 643 **Real-time PCR**

644 RNA was isolated from cells and treated with DNase using a PerfectPure RNA cultured cell kit  
645 (5PRIME). RNA was quantified by NanoDrop™ (Thermo Fisher Scientific) and 2µg was reverse  
646 transcribed with a High Capacity cDNA Reverse Transcription kit (Applied Biosystems, Foster  
647 City, CA). Real-time PCR was performed with TaqMan™ Universal PCR Master Mix (Applied  
648 Biosystems) on a Bio-Rad CFX96/384 thermocycler. *HPRT1* or *RPLPO* were used as  
649 housekeeping genes to monitor variations between biological replicates. TaqMan™ primer  
650 probes were purchased from Applied Biosystems and are listed in **Sup. Table 10**.

651

### 652 **Flow cytometry**

653 MSCs dissociated in 10mM EDTA/PBS solution for 5-10 minutes were resuspended in 5%  
654 FBS/PBS, counted, and pelleted at 450xg. Excess buffer was aspirated and MSCs were divided  
655 into 50-100K cell aliquots in 100µL of 5% FBS/PBS. Isotype controls and primary antibodies (**Sup.**  
656 **Table 8**) were added to cell suspensions and incubated for ~45 minutes in the dark on ice. Cell  
657 suspensions were washed in excess 5% FBS/PBS and pelleted to remove unbound antibody.  
658 Flow cytometry data was acquired on an LSR II (Becton Dickinson, Franklin Lakes, NJ) using  
659 FACSDiva (Becton Dickinson) at the London Regional Flow Cytometry Facility and analyzed with  
660 FlowJo (FlowJo LLC, Ashland, OR, Version 10.0.8r1). The gating strategy for live singlets was

661 based on forward and side-scatter and is illustrated in **Sup. Fig. 5**. The CellTrace™ Violet Cell  
662 Proliferation assay (Thermo Fisher Scientific) was performed as instructed by the manufacturer.  
663 Briefly, MSCs were labelled in suspension with CellTrace™ Violet dye. After 20 min incubation at  
664 37°C in the dark, MSCs were incubated for 5 min with culture medium to remove any free dye  
665 remaining in the solution. MSCs were pelleted, resuspended in fresh pre-warmed complete  
666 culture medium, and plated onto 6-well plates prior to incubation with CM.

667

### 668 **ELISAs**

669 ELISA kits were purchased from eBioscience (IL-6) or R&D Systems (CXCL1, CXCL8 and CSF1)  
670 and performed according to the manufacturer's specifications using CM derived from MDA-MB-  
671 231 and SUM149 cell lines.

672

### 673 **Gene expression profiling**

674 HDFs were cultured until ~40-60% confluence, washed twice with PBS and incubated overnight  
675 in DMEM+0.5%FBS. The following day, cells were treated +/- rhNODAL (10 ng/mL) for 6h and  
676 RNA was harvested using TRIzol™ (Invitrogen). RNA was subjected to expression profiling at the  
677 London Regional Genomics Centre essentially as previously described<sup>102,103</sup>. RNA quality was  
678 assessed using an Agilent 2100 Bioanalyzer (Agilent Technologies, Santa Clara, CA) prior to  
679 preparing single stranded complimentary DNA (sscDNA) from 200ng of total RNA (Ambion WT  
680 Expression Kit for Affymetrix GeneChip Whole Transcript WT Expression Arrays; Applied  
681 Biosystems, Carlsbad, CA) according to the Affymetrix User Manual (Affymetrix, Santa Clara,  
682 CA). In total, 5.5µg of sscDNA was synthesized, converted into cRNA, end labeled and  
683 hybridized (16h at 45°C) to Human Gene 1.0 ST arrays. Liquid handling steps were performed by  
684 a GeneChip Fluidics Station 450 and GeneChips were scanned (GeneChip Scanner 3000 7G;  
685 Affymetrix) using Command Console v1.1 to generate Probe level (.CEL file) data. Gene level  
686 data was generated using the RMA algorithm<sup>104</sup>. Partek Genomics Suite v6.5 (St. Louis, MO) was

687 used to determine gene level ANOVA p-values and fold-changes. Fold-changes were obtained  
688 by averaging data from two experiments (GeneSpring, Agilent). Fold-changes exceeding 1.7 in  
689 response to rhNODAL were required to identify a transcript as being altered ( $p < 0.05$ ). Altered  
690 genes were annotated using DAVID (version 6.7) and lists enriched  $> 3.5$  fold and comprised of  
691  $> 10$  genes were reported.

692

### 693 **Acknowledgements**

694 We thank Dr. Dean Betts (Western University), Dr. John Di Guglielmo (Western University) and  
695 Dr. Dwayne Jackson (Western University) for providing access to PCR and imaging equipment  
696 and Paula Pittock for technical support. The work was funded by operating grants from the  
697 CIHR and the Canadian Breast Cancer Foundation awarded to LMP.

698

### 699 **Competing Interests**

700 None of the authors has competing interests to declare.

701

702

703

704

705

706

707

## 708 References

- 709 1. Martinez-Outschoorn UE, Goldberg A, Lin Z, Ko YH, Flomenberg N, Wang C, Pavlides S, Pestell  
710 RG, Howell A, Sotgia F, Lisanti MP. Anti-estrogen resistance in breast cancer is induced by the  
711 tumor microenvironment and can be overcome by inhibiting mitochondrial function in epithelial  
712 cancer cells. *Cancer Biol Ther.* 2011;12(10):924-938.
- 713 2. Farmer P, Bonnefoi H, Anderle P, Cameron D, Wirapati P, Becette V, Andre S, Piccart M, Campone  
714 M, Brain E, Macgrogan G, Petit T, Jassem J, Bibeau F, Blot E, Bogaerts J, Aguet M, Bergh J, Iggo  
715 R, Delorenzi M. A stroma-related gene signature predicts resistance to neoadjuvant chemotherapy  
716 in breast cancer. *Nat Med.* 2009;15(1):68-74.
- 717 3. Dittmer J, Leyh B. The impact of tumor stroma on drug response in breast cancer. *Semin Cancer  
718 Biol.* 2015;31:3-15.
- 719 4. Allinen M, Beroukhi R, Cai L, Brennan C, Lahti-Domenici J, Huang H, Porter D, Hu M, Chin L,  
720 Richardson A, Schnitt S, Sellers WR, Polyak K. Molecular characterization of the tumor  
721 microenvironment in breast cancer. *Cancer Cell.* 2004;6(1):17-32.
- 722 5. Ma XJ, Dahiya S, Richardson E, Erlander M, Sgroi DC. Gene expression profiling of the tumor  
723 microenvironment during breast cancer progression. *Breast Cancer Res.* 2009;11(1):R7.
- 724 6. Su S, Chen J, Yao H, Liu J, Yu S, Lao L, Wang M, Luo M, Xing Y, Chen F, Huang D, Zhao J, Yang  
725 L, Liao D, Su F, Li M, Liu Q, Song E. CD10(+)GPR77(+) Cancer-Associated Fibroblasts Promote  
726 Cancer Formation and Chemoresistance by Sustaining Cancer Stemness. *Cell.* 2018;172(4):841-  
727 856.e816.
- 728 7. Chatterjee S, Bhat V, Berdnikov A, Liu J, Zhang G, Buchel E, Safneck J, Marshall AJ, Murphy LC,  
729 Postovit LM, Raouf A. Paracrine Crosstalk between Fibroblasts and ER(+) Breast Cancer Cells  
730 Creates an IL1beta-Enriched Niche that Promotes Tumor Growth. *iScience.* 2019;19:388-401.
- 731 8. Kalluri R. The biology and function of fibroblasts in cancer. *Nat Rev Cancer.* 2016;16(9):582-598.
- 732 9. Gabbiani G. The myofibroblast in wound healing and fibrocontractive diseases. *J Pathol.*  
733 2003;200(4):500-503.
- 734 10. Rockey DC, Weymouth N, Shi Z. Smooth muscle alpha actin (Acta2) and myofibroblast function  
735 during hepatic wound healing. *PLoS One.* 2013;8(10):e77166.
- 736 11. Fukumura D, Xavier R, Sugiura T, Chen Y, Park EC, Lu N, Selig M, Nielsen G, Taksir T, Jain RK,  
737 Seed B. Tumor induction of VEGF promoter activity in stromal cells. *Cell.* 1998;94(6):715-725.
- 738 12. Buechler MB, Turley SJ. A short field guide to fibroblast function in immunity. *Semin Immunol.*  
739 2018;35:48-58.
- 740 13. Biffi G, Oni TE, Spielman B, Hao Y, Elyada E, Park Y, Preall J, Tuveson DA. IL1-Induced JAK/STAT  
741 Signaling Is Antagonized by TGFbeta to Shape CAF Heterogeneity in Pancreatic Ductal  
742 Adenocarcinoma. *Cancer Discov.* 2019;9(2):282-301.
- 743 14. Brizzi MF, Tarone G, Defilippi P. Extracellular matrix, integrins, and growth factors as tailors of the  
744 stem cell niche. *Curr Opin Cell Biol.* 2012;24(5):645-651.
- 745 15. Le Guen L, Marchal S, Faure S, de Santa Barbara P. Mesenchymal-epithelial interactions during  
746 digestive tract development and epithelial stem cell regeneration. *Cell Mol Life Sci.*  
747 2015;72(20):3883-3896.
- 748 16. De Wever O, Nguyen QD, Van Hoorde L, Bracke M, Bruyneel E, Gespach C, Mareel M. Tenascin-  
749 C and SF/HGF produced by myofibroblasts in vitro provide convergent pro-invasive signals to  
750 human colon cancer cells through RhoA and Rac. *FASEB J.* 2004;18(9):1016-1018.
- 751 17. Tomasek JJ, Gabbiani G, Hinz B, Chaponnier C, Brown RA. Myofibroblasts and mechano-  
752 regulation of connective tissue remodeling. *Nat Rev Mol Cell Biol.* 2002;3(5):349-363.
- 753 18. Erez N, Truitt M, Olson P, Arron ST, Hanahan D. Cancer-Associated Fibroblasts Are Activated in  
754 Incipient Neoplasia to Orchestrate Tumor-Promoting Inflammation in an NF-kappaB-Dependent  
755 Manner. *Cancer Cell.* 2010;17(2):135-147.
- 756 19. Calvo F, Ranftl R, Hooper S, Farrugia AJ, Moeendarbary E, Bruckbauer A, Batista F, Charras G,  
757 Sahai E. Cdc42EP3/BORG2 and Septin Network Enables Mechano-transduction and the  
758 Emergence of Cancer-Associated Fibroblasts. *Cell Rep.* 2015;13(12):2699-2714.
- 759 20. Amatangelo MD, Bassi DE, Klein-Szanto AJ, Cukierman E. Stroma-derived three-dimensional  
760 matrices are necessary and sufficient to promote desmoplastic differentiation of normal fibroblasts.  
761 *Am J Pathol.* 2005;167(2):475-488.

- 762 21. Orimo A, Gupta PB, SgROI DC, Arenzana-Seisdedos F, Delaunay T, Naeem R, Carey VJ,  
763 Richardson AL, Weinberg RA. Stromal fibroblasts present in invasive human breast carcinomas  
764 promote tumor growth and angiogenesis through elevated SDF-1/CXCL12 secretion. *Cell*.  
765 2005;121(3):335-348.
- 766 22. Heo TH, Wahler J, Suh N. Potential therapeutic implications of IL-6/IL-6R/gp130-targeting agents  
767 in breast cancer. *Oncotarget*. 2016;7(13):15460-15473.
- 768 23. Bartoschek M, Oskolkov N, Bocci M, Lovrot J, Larsson C, Sommarin M, Madsen CD, Lindgren D,  
769 Pekar G, Karlsson G, Ringner M, Bergh J, Bjorklund A, Pietras K. Spatially and functionally distinct  
770 subclasses of breast cancer-associated fibroblasts revealed by single cell RNA sequencing. *Nat*  
771 *Commun*. 2018;9(1):5150.
- 772 24. Direkze NC, Jeffery R, Hodivala-Dilke K, Hunt T, Playford RJ, Elia G, Poulson R, Wright NA, Alison  
773 MR. Bone marrow-derived stromal cells express lineage-related messenger RNA species. *Cancer*  
774 *Res*. 2006;66(3):1265-1269.
- 775 25. Worthley DL, Ruzsiewicz A, Davies R, Moore S, Nivison-Smith I, Bik To L, Browett P, Western R,  
776 Durrant S, So J, Young GP, Mullighan CG, Barty PG, Michael MZ. Human gastrointestinal  
777 neoplasia-associated myofibroblasts can develop from bone marrow-derived cells following  
778 allogeneic stem cell transplantation. *Stem Cells*. 2009;27(6):1463-1468.
- 779 26. Quante M, Tu SP, Tomita H, Gonda T, Wang SS, Takashi S, Baik GH, Shibata W, Diprete B, Betz  
780 KS, Friedman R, Varro A, Tycko B, Wang TC. Bone marrow-derived myofibroblasts contribute to  
781 the mesenchymal stem cell niche and promote tumor growth. *Cancer Cell*. 2011;19(2):257-272.
- 782 27. Goldstein RH, Reagan MR, Anderson K, Kaplan DL, Rosenblatt M. Human bone marrow-derived  
783 MSCs can home to orthotopic breast cancer tumors and promote bone metastasis. *Cancer Res*.  
784 2010;70(24):10044-10050.
- 785 28. Mishra PJ, Mishra PJ, Humeniuk R, Medina DJ, Alexe G, Mesirov JP, Ganesan S, Glod JW,  
786 Banerjee D. Carcinoma-associated fibroblast-like differentiation of human mesenchymal stem  
787 cells. *Cancer Res*. 2008;68(11):4331-4339.
- 788 29. Shangguan L, Ti X, Krause U, Hai B, Zhao Y, Yang Z, Liu F. Inhibition of TGF-beta/Smad signaling  
789 by BAMBI blocks differentiation of human mesenchymal stem cells to carcinoma-associated  
790 fibroblasts and abolishes their protumor effects. *Stem Cells*. 2012;30(12):2810-2819.
- 791 30. Spaeth E, Klopp A, Dembinski J, Andreeff M, Marini F. Inflammation and tumor microenvironments:  
792 defining the migratory itinerary of mesenchymal stem cells. *Gene Ther*. 2008;15(10):730-738.
- 793 31. Pelham RJ, Rodgers L, Hall I, Lucito R, Nguyen KC, Navin N, Hicks J, Mu D, Powers S, Wigler M,  
794 Botstein D. Identification of alterations in DNA copy number in host stromal cells during tumor  
795 progression. *Proc Natl Acad Sci U S A*. 2006;103(52):19848-19853.
- 796 32. Patocs A, Zhang L, Xu Y, Weber F, Caldes T, Mutter GL, Platzer P, Eng C. Breast-cancer stromal  
797 cells with TP53 mutations and nodal metastases. *N Engl J Med*. 2007;357(25):2543-2551.
- 798 33. Rummel S, Valente AL, Kane JL, Shriver CD, Ellsworth RE. Genomic (in)stability of the breast  
799 tumor microenvironment. *Mol Cancer Res*. 2012;10(12):1526-1531.
- 800 34. Qiu W, Hu M, Sridhar A, Opeskin K, Fox S, Shipitsin M, Trivett M, Thompson ER, Ramakrishna M,  
801 Gorringer KL, Polyak K, Haviv I, Campbell IG. No evidence of clonal somatic genetic alterations in  
802 cancer-associated fibroblasts from human breast and ovarian carcinomas. *Nat Genet*.  
803 2008;40(5):650-655.
- 804 35. Fiegl H, Millinger S, Goebel G, Muller-Holzner E, Marth C, Laird PW, Widschwendter M. Breast  
805 cancer DNA methylation profiles in cancer cells and tumor stroma: association with HER-2/neu  
806 status in primary breast cancer. *Cancer Res*. 2006;66(1):29-33.
- 807 36. Hu M, Yao J, Cai L, Bachman KE, van den Brule F, Velculescu V, Polyak K. Distinct epigenetic  
808 changes in the stromal cells of breast cancers. *Nat Genet*. 2005;37(8):899-905.
- 809 37. Tyan SW, Hsu CH, Peng KL, Chen CC, Kuo WH, Lee EY, Shew JY, Chang KJ, Juan LJ, Lee WH.  
810 Breast cancer cells induce stromal fibroblasts to secrete ADAMTS1 for cancer invasion through an  
811 epigenetic change. *PLoS One*. 2012;7(4):e35128.
- 812 38. Patel S, Ngounou Wetie AG, Darie CC, Clarkson BD. Cancer secretomes and their place in  
813 supplementing other hallmarks of cancer. *Adv Exp Med Biol*. 2014;806:409-442.
- 814 39. da Cunha BR, Domingos C, Stefanini ACB, Henrique T, Polachini GM, Castelo-Branco P, Tajara  
815 EH. Cellular Interactions in the Tumor Microenvironment: The Role of Secretome. *J Cancer*.  
816 2019;10(19):4574-4587.

- 817 40. Madden EC, Gorman AM, Logue SE, Samali A. Tumour Cell Secretome in Chemoresistance and  
818 Tumour Recurrence. *Trends Cancer*. 2020;6(6):489-505.
- 819 41. Topczewska JM, Postovit LM, Margaryan NV, Sam A, Hess AR, Wheaton WW, Nickoloff BJ,  
820 Topczewski J, Hendrix MJ. Embryonic and tumorigenic pathways converge via Nodal signaling:  
821 role in melanoma aggressiveness. *Nat Med*. 2006;12(8):925-932.
- 822 42. Quail DF, Siegers GM, Jewer M, Postovit LM. Nodal signalling in embryogenesis and  
823 tumorigenesis. *Int J Biochem Cell Biol*. 2013;45(4):885-898.
- 824 43. Chen J, Liu WB, Jia WD, Xu GL, Ma JL, Ren Y, Chen H, Sun SN, Huang M, Li JS. Embryonic  
825 morphogen nodal is associated with progression and poor prognosis of hepatocellular carcinoma.  
826 *PLoS One*. 2014;9(1):e85840.
- 827 44. Strizzi L, Hardy KM, Margaryan NV, Hillman DW, Seftor EA, Chen B, Geiger XJ, Thompson EA,  
828 Lingle WL, Andorfer CA, Perez EA, Hendrix MJ. Potential for the embryonic morphogen Nodal as  
829 a prognostic and predictive biomarker in breast cancer. *Breast Cancer Res*. 2012;14(3):R75.
- 830 45. Quail DF, Walsh LA, Zhang G, Findlay SD, Moreno J, Fung L, Ablack A, Lewis JD, Done SJ, Hess  
831 DA, Postovit LM. Embryonic protein nodal promotes breast cancer vascularization. *Cancer Res*.  
832 2012;72(15):3851-3863.
- 833 46. Guo Q, Li VZ, Nichol JN, Huang F, Yang W, Preston SEJ, Talat Z, Lefrere H, Yu H, Zhang G, Basik  
834 M, Goncalves C, Zhan Y, Plourde D, Su J, Torres J, Marques M, Habyan SA, Bijian K, Amant F,  
835 Witcher M, Behbod F, McCaffrey L, Alaoui-Jamali M, Giannakopoulos NV, Brackstone M, Postovit  
836 LM, Del Rincon SV, Miller WH, Jr. MNK1/NODAL Signaling Promotes Invasive Progression of  
837 Breast Ductal Carcinoma In Situ. *Cancer Res*. 2019;79(7):1646-1657.
- 838 47. Jewer M, Lee L, Leibovitch M, Zhang G, Liu J, Findlay SD, Vincent KM, Tandoc K, Dieters-Castator  
839 D, Quail DF, Dutta I, Coatham M, Xu Z, Puri A, Guan BJ, Hatzoglou M, Brumwell A, Uniacke J,  
840 Patsis C, Koromilas A, Schueler J, Siegers GM, Topisirovic I, Postovit LM. Translational control of  
841 breast cancer plasticity. *Nat Commun*. 2020;11(1):2498.
- 842 48. Quail DF, Zhang G, Walsh LA, Siegers GM, Dieters-Castator DZ, Findlay SD, Broughton H, Putman  
843 DM, Hess DA, Postovit LM. Embryonic morphogen nodal promotes breast cancer growth and  
844 progression. *PLoS One*. 2012;7(11):e48237.
- 845 49. Quail DF, Zhang G, Findlay SD, Hess DA, Postovit LM. Nodal promotes invasive phenotypes via a  
846 mitogen-activated protein kinase-dependent pathway. *Oncogene*. 2014;33(4):461-473.
- 847 50. Siegers GM, Dutta I, Kang EY, Huang J, Köbel M, Postovit L-M. Aberrantly Expressed Embryonic  
848 Protein NODAL Alters Breast Cancer Cell Susceptibility to  $\gamma\delta$  T Cell Cytotoxicity. *Frontiers in*  
849 *Immunology*. 2020;11(1287).
- 850 51. Pang T, Yin X, Luo T, Lu Z, Nie M, Yin K, Xue X. Cancer-associated fibroblasts promote malignancy  
851 of gastric cancer cells via Nodal signalling. *Cell Biochem Funct*. 2020;38(1):4-11.
- 852 52. Li Z, Zhang J, Zhou J, Lu L, Wang H, Zhang G, Wan G, Cai S, Du J. Nodal Facilitates Differentiation  
853 of Fibroblasts to Cancer-Associated Fibroblasts that Support Tumor Growth in Melanoma and  
854 Colorectal Cancer. *Cells*. 2019;8(6).
- 855 53. Huang da W, Sherman BT, Lempicki RA. Systematic and integrative analysis of large gene lists  
856 using DAVID bioinformatics resources. *Nat Protoc*. 2009;4(1):44-57.
- 857 54. Ali HR, Jackson HW, Zanotelli VRT, Danenberg E, Fischer JR, Bardwell H, Provenzano E, CRUK  
858 IMAXT Grand Challenge Team, Rueda OM, Chin SF, Aparicio S, Caldas C, Bodenmiller B. Imaging  
859 mass cytometry and multiplatform genomics define the phenogenomic landscape of breast cancer.  
860 *Nature Cancer*. 2020;1(2):163-175.
- 861 55. Capoccia BJ, Robson DL, Levac KD, Maxwell DJ, Hohm SA, Neelamkavil MJ, Bell GI, Xenocostas  
862 A, Link DC, Piwnicka-Worms D, Nolte JA, Hess DA. Revascularization of ischemic limbs after  
863 transplantation of human bone marrow cells with high aldehyde dehydrogenase activity. *Blood*.  
864 2009;113(21):5340-5351.
- 865 56. Bell GI, Broughton HC, Levac KD, Allan DA, Xenocostas A, Hess DA. Transplanted human bone  
866 marrow progenitor subtypes stimulate endogenous islet regeneration and revascularization. *Stem*  
867 *Cells Dev*. 2012;21(1):97-109.
- 868 57. Geiger T, Wehner A, Schaab C, Cox J, Mann M. Comparative proteomic analysis of eleven  
869 common cell lines reveals ubiquitous but varying expression of most proteins. *Mol Cell Proteomics*.  
870 2012;11(3):M111 014050.

- 871 58. Pozniak Y, Balint-Lahat N, Rudolph JD, Lindskog C, Katzir R, Avivi C, Ponten F, Ruppin E,  
872 Barshack I, Geiger T. System-wide Clinical Proteomics of Breast Cancer Reveals Global  
873 Remodeling of Tissue Homeostasis. *Cell Syst.* 2016;2(3):172-184.
- 874 59. Tyanova S, Temu T, Sinitcyn P, Carlson A, Hein MY, Geiger T, Mann M, Cox J. The Perseus  
875 computational platform for comprehensive analysis of (prote)omics data. *Nat Methods.*  
876 2016;13(9):731-740.
- 877 60. Hartman ZC, Poage GM, den Hollander P, Tsimelzon A, Hill J, Panupinthu N, Zhang Y, Mazumdar  
878 A, Hilsenbeck SG, Mills GB, Brown PH. Growth of triple-negative breast cancer cells relies upon  
879 coordinate autocrine expression of the proinflammatory cytokines IL-6 and IL-8. *Cancer Res.*  
880 2013;73(11):3470-3480.
- 881 61. Acharyya S, Oskarsson T, Vanharanta S, Malladi S, Kim J, Morris PG, Manova-Todorova K,  
882 Leversha M, Hogg N, Seshan VE, Norton L, Brogi E, Massague J. A CXCL1 paracrine network  
883 links cancer chemoresistance and metastasis. *Cell.* 2012;150(1):165-178.
- 884 62. Liu S, Ginestier C, Ou SJ, Clouthier SG, Patel SH, Monville F, Korkaya H, Heath A, Dutcher J,  
885 Kleer CG, Jung Y, Dontu G, Taichman R, Wicha MS. Breast cancer stem cells are regulated by  
886 mesenchymal stem cells through cytokine networks. *Cancer Res.* 2011;71(2):614-624.
- 887 63. Bertero A, Madrigal P, Galli A, Hubner NC, Moreno I, Burks D, Brown S, Pedersen RA, Gaffney D,  
888 Mendjan S, Pauklin S, Vallier L. Activin/nodal signaling and NANOG orchestrate human embryonic  
889 stem cell fate decisions by controlling the H3K4me3 chromatin mark. *Genes Dev.* 2015;29(7):702-  
890 717.
- 891 64. Lim B, Woodward WA, Wang X, Reuben JM, Ueno NT. Inflammatory breast cancer biology: the  
892 tumour microenvironment is key. *Nat Rev Cancer.* 2018;18(8):485-499.
- 893 65. Kishimoto K, Liu S, Tsuji T, Olson KA, Hu GF. Endogenous angiogenin in endothelial cells is a  
894 general requirement for cell proliferation and angiogenesis. *Oncogene.* 2005;24(3):445-456.
- 895 66. Fagiani E, Christofori G. Angiopoietins in angiogenesis. *Cancer Lett.* 2013;328(1):18-26.
- 896 67. Massague J. TGFbeta signalling in context. *Nat Rev Mol Cell Biol.* 2012;13(10):616-630.
- 897 68. Zhang Y, Alexander PB, Wang XF. TGF-beta Family Signaling in the Control of Cell Proliferation  
898 and Survival. *Cold Spring Harb Perspect Biol.* 2017;9(4).
- 899 69. Derynck R, Zhang YE. Smad-dependent and Smad-independent pathways in TGF-beta family  
900 signalling. *Nature.* 2003;425(6958):577-584.
- 901 70. Buchsbaum RJ, Oh SY. Breast Cancer-Associated Fibroblasts: Where We Are and Where We  
902 Need to Go. *Cancers (Basel).* 2016;8(2).
- 903 71. Marsh T, Pietras K, McAllister SS. Fibroblasts as architects of cancer pathogenesis. *Biochim*  
904 *Biophys Acta.* 2013;1832(7):1070-1078.
- 905 72. Shao ZM, Nguyen M, Barsky SH. Human breast carcinoma desmoplasia is PDGF initiated.  
906 *Oncogene.* 2000;19(38):4337-4345.
- 907 73. Hugo HJ, Leuret S, Tomaskovic-Crook E, Ahmed N, Blick T, Newgreen DF, Thompson EW,  
908 Ackland ML. Contribution of Fibroblast and Mast Cell (Afferent) and Tumor (Efferent) IL-6 Effects  
909 within the Tumor Microenvironment. *Cancer Microenviron.* 2012;5(1):83-93.
- 910 74. Kojima Y, Acar A, Eaton EN, Mellody KT, Scheel C, Ben-Porath I, Onder TT, Wang ZC, Richardson  
911 AL, Weinberg RA, Orimo A. Autocrine TGF-beta and stromal cell-derived factor-1 (SDF-1) signaling  
912 drives the evolution of tumor-promoting mammary stromal myofibroblasts. *Proc Natl Acad Sci U S*  
913 *A.* 2010;107(46):20009-20014.
- 914 75. Duan W, Li R, Ma J, Lei J, Xu Q, Jiang Z, Nan L, Li X, Wang Z, Huo X, Han L, Wu Z, Wu E, Ma Q.  
915 Overexpression of Nodal induces a metastatic phenotype in pancreatic cancer cells via the  
916 Smad2/3 pathway. *Oncotarget.* 2015;6(3):1490-1506.
- 917 76. LeBleu VS, Kalluri R. A peek into cancer-associated fibroblasts: origins, functions and translational  
918 impact. *Dis Model Mech.* 2018;11(4).
- 919 77. Shiga K, Hara M, Nagasaki T, Sato T, Takahashi H, Takeyama H. Cancer-Associated Fibroblasts:  
920 Their Characteristics and Their Roles in Tumor Growth. *Cancers (Basel).* 2015;7(4):2443-2458.
- 921 78. Orimo A, Weinberg RA. Heterogeneity of stromal fibroblasts in tumors. *Cancer Biol Ther.*  
922 2007;6(4):618-619.
- 923 79. Sugimoto H, Mundel TM, Kieran MW, Kalluri R. Identification of fibroblast heterogeneity in the tumor  
924 microenvironment. *Cancer Biol Ther.* 2006;5(12):1640-1646.

- 925 80. Blache U, Horton ER, Xia T, Schoof EM, Blicher LH, Schonenberger A, Snedeker JG, Martin I,  
926 Erler JT, Ehrbar M. Mesenchymal stromal cell activation by breast cancer secretomes in  
927 bioengineered 3D microenvironments. *Life Sci Alliance*. 2019;2(3).
- 928 81. Park JI, Lee MG, Cho K, Park BJ, Chae KS, Byun DS, Ryu BK, Park YK, Chi SG. Transforming  
929 growth factor-beta1 activates interleukin-6 expression in prostate cancer cells through the  
930 synergistic collaboration of the Smad2, p38-NF-kappaB, JNK, and Ras signaling pathways.  
931 *Oncogene*. 2003;22(28):4314-4332.
- 932 82. Gupta J, Robbins J, Jilling T, Seth P. TGFbeta-dependent induction of interleukin-11 and  
933 interleukin-8 involves SMAD and p38 MAPK pathways in breast tumor models with varied bone  
934 metastases potential. *Cancer Biol Ther*. 2011;11(3):311-316.
- 935 83. Bierie B, Chung CH, Parker JS, Stover DG, Cheng N, Chytil A, Aakre M, Shyr Y, Moses HL.  
936 Abrogation of TGF-beta signaling enhances chemokine production and correlates with prognosis  
937 in human breast cancer. *J Clin Invest*. 2009;119(6):1571-1582.
- 938 84. Hendrix MJ, Kandela I, Mazar AP, Seftor EA, Seftor RE, Margaryan NV, Strizzi L, Murphy GF, Long  
939 GV, Scolyer RA. Targeting melanoma with front-line therapy does not abrogate Nodal-expressing  
940 tumor cells. *Lab Invest*. 2017;97(2):176-186.
- 941 85. Coda DM, Gaarenstroom T, East P, Patel H, Miller DS, Lobley A, Matthews N, Stewart A, Hill CS.  
942 Distinct modes of SMAD2 chromatin binding and remodeling shape the transcriptional response to  
943 NODAL/Activin signaling. *Elife*. 2017;6.
- 944 86. Yun MR, Choi HM, Kang HN, Lee Y, Joo HS, Kim DH, Kim HR, Hong MH, Yoon SO, Cho BC. ERK-  
945 dependent IL-6 autocrine signaling mediates adaptive resistance to pan-PI3K inhibitor BKM120 in  
946 head and neck squamous cell carcinoma. *Oncogene*. 2018;37(3):377-388.
- 947 87. Balko JM, Schwarz LJ, Bhola NE, Kurupi R, Owens P, Miller TW, Gomez H, Cook RS, Arteaga CL.  
948 Activation of MAPK pathways due to DUSP4 loss promotes cancer stem cell-like phenotypes in  
949 basal-like breast cancer. *Cancer Res*. 2013;73(20):6346-6358.
- 950 88. Karp JM, Leng Teo GS. Mesenchymal stem cell homing: the devil is in the details. *Cell Stem Cell*.  
951 2009;4(3):206-216.
- 952 89. Dominici M, Le Blanc K, Mueller I, Slaper-Cortenbach I, Marini F, Krause D, Deans R, Keating A,  
953 Prockop D, Horwitz E. Minimal criteria for defining multipotent mesenchymal stromal cells. The  
954 International Society for Cellular Therapy position statement. *Cytotherapy*. 2006;8(4):315-317.
- 955 90. Ponte AL, Marais E, Gallay N, Langonne A, Delorme B, Herault O, Charbord P, Domenech J. The  
956 in vitro migration capacity of human bone marrow mesenchymal stem cells: comparison of  
957 chemokine and growth factor chemotactic activities. *Stem Cells*. 2007;25(7):1737-1745.
- 958 91. Chamberlain G, Wright K, Rot A, Ashton B, Middleton J. Murine mesenchymal stem cells exhibit a  
959 restricted repertoire of functional chemokine receptors: comparison with human. *PLoS One*.  
960 2008;3(8):e2934.
- 961 92. Ringe J, Strassburg S, Neumann K, Endres M, Notter M, Burmester GR, Kaps C, Sittlinger M.  
962 Towards in situ tissue repair: human mesenchymal stem cells express chemokine receptors  
963 CXCR1, CXCR2 and CCR2, and migrate upon stimulation with CXCL8 but not CCL2. *J Cell*  
964 *Biochem*. 2007;101(1):135-146.
- 965 93. Pricola KL, Kuhn NZ, Haleem-Smith H, Song Y, Tuan RS. Interleukin-6 maintains bone marrow-  
966 derived mesenchymal stem cell stemness by an ERK1/2-dependent mechanism. *J Cell Biochem*.  
967 2009;108(3):577-588.
- 968 94. Wolfe AR, Trenton NJ, Debeb BG, Larson R, Ruffell B, Chu K, Hittelman W, Diehl M, Reuben JM,  
969 Ueno NT, Woodward WA. Mesenchymal stem cells and macrophages interact through IL-6 to  
970 promote inflammatory breast cancer in pre-clinical models. *Oncotarget*. 2016;7(50):82482-82492.
- 971 95. Zhang T, Tseng C, Zhang Y, Sirin O, Corn PG, Li-Ning-Tapia EM, Troncoso P, Davis J, Pettaway  
972 C, Ward J, Frazier ML, Logothetis C, Kolonin MG. CXCL1 mediates obesity-associated adipose  
973 stromal cell trafficking and function in the tumour microenvironment. *Nat Commun*. 2016;7:11674.
- 974 96. Sherman SE, Kuljanin M, Cooper TT, Putman DM, Lajoie GA, Hess DA. High Aldehyde  
975 Dehydrogenase Activity Identifies a Subset of Human Mesenchymal Stromal Cells with Vascular  
976 Regenerative Potential. *Stem Cells*. 2017;35(6):1542-1553.
- 977 97. Bendall SC, Hughes C, Stewart MH, Doble B, Bhatia M, Lajoie GA. Prevention of amino acid  
978 conversion in SILAC experiments with embryonic stem cells. *Mol Cell Proteomics*. 2008;7(9):1587-  
979 1597.



- 980 98. Kuljanin M, Dieters-Castator DZ, Hess DA, Postovit LM, Lajoie GA. Comparison of sample  
981 preparation techniques for large-scale proteomics. *Proteomics*. 2017;17(1-2).  
982 99. Wessel D, Flugge UI. A method for the quantitative recovery of protein in dilute solution in the  
983 presence of detergents and lipids. *Anal Biochem*. 1984;138(1):141-143.  
984 100. Kulak NA, Pichler G, Paron I, Nagaraj N, Mann M. Minimal, encapsulated proteomic-sample  
985 processing applied to copy-number estimation in eukaryotic cells. *Nat Methods*. 2014;11(3):319-  
986 324.  
987 101. Cox J, Mann M. MaxQuant enables high peptide identification rates, individualized p.p.b.-range  
988 mass accuracies and proteome-wide protein quantification. *Nat Biotechnol*. 2008;26(12):1367-  
989 1372.  
990 102. Guo F, Carter DE, Leask A. Mechanical tension increases CCN2/CTGF expression and  
991 proliferation in gingival fibroblasts via a TGFbeta-dependent mechanism. *PLoS One*.  
992 2011;6(5):e19756.  
993 103. Kuk H, Hutchenreuther J, Murphy-Marshman H, Carter D, Leask A. 5Z-7-Oxozeanol Inhibits the  
994 Effects of TGFbeta1 on Human Gingival Fibroblasts. *PLoS One*. 2015;10(4):e0123689.  
995 104. Irizarry RA, Hobbs B, Collin F, Beazer-Barclay YD, Antonellis KJ, Scherf U, Speed TP. Exploration,  
996 normalization, and summaries of high density oligonucleotide array probe level data. *Biostatistics*.  
997 2003;4(2):249-264.
